# Supplementary material for: Use of electrical resistivity tomography to reveal the shallow freshwater–saline interface in The Fens coastal groundwater, eastern England (UK)
Source: Springer Nature journal article supplement (doi:10.1007/s10040-022-02586-2), 2023-01-20

## Hydrogeology Journal – Electronic Supplementary Material (ESM1)

### Use of electrical resistivity tomography to reveal the shallow freshwater-saline interface in The Fens coastal groundwater, eastern England (UK)

Mitchell Moulds<sup>1</sup>, Dr Iain Gould<sup>2</sup>, Isobel Wright<sup>2,3</sup>, David Webster<sup>4</sup>, Dr Daniel Magnone<sup>1\*</sup>

- 1 Department of Geography, University of Lincoln, UK
- 2 Lincoln Institute for Agri-Food Technology, University of Lincoln, UK
- 3 (now at) Wilder Doddington, Lincolnshire, UK
- 4 Edlington Consulting Group Ltd, UK

\*Corresponding Author: [dmagnone@lincoln.ac.uk](mailto:dmagnone@lincoln.ac.uk)

Department of Geography, University of Lincoln, Brayford Way, Brayford Pool, Lincoln LN6 7TS

## Contents

|                                                                                                             |    |
|-------------------------------------------------------------------------------------------------------------|----|
| Section A: Stratigraphic Core Records Interpreted from British Geological Survey .....                      | 2  |
| Section B1: Inferred Water Level, Freshwater-Saline Boundary and Freshwater Lens in the Winter Season ..... | 5  |
| Section B2: Inferred Water Level, Freshwater-Saline Boundary and Freshwater Lens in the Summer Season ..... | 6  |
| Section C: Geostatistical Analysis R Code .....                                                             | 7  |
| Section D: Winter ERT survey scans .....                                                                    | 8  |
| Section E: Summer ERT Survey Scans .....                                                                    | 18 |
| Section F: Geostatistical Variograms .....                                                                  | 28 |
| Section G: Water level and Freshwater-Saline Interface Variance Error Maps .....                            | 29 |

## Introduction

This ESM document provides

1. the interpreted stratigraphic code records (Section A) to accompany section '*Stratigraphy*' in the main article;
2. the interpreted water level, freshwater-saline boundary and freshwater lens from the raw ERT data (Sections B1 & B2) to accompany section '*Electro resistivity tomography*' in the main article.
3. The geostatistical code used to produce Figure 4 of the main article (Section C);
4. All winter ERT survey scans.
5. All summer ERT survey scans.
6. The variograms from which Figure 4 of the main article was calculated (Section F);
7. The accompanying variance maps for the main article's Figures 5 a,b,d and e.

Other files attached to this article as further supplementary information include the raw ERT data files as csv files. See ESM2.

Section A: Stratigraphic Core Records Interpreted from British Geological Survey Data

| Borehole | Lon    | Lat    | Water (m bgl) | Clay Base (m) | Silt Base (m) | Sand Base (m) |
|----------|--------|--------|---------------|---------------|---------------|---------------|
| TF43SW1  | 541310 | 332030 |               | 59.74         | 0             | 18.9          |
| TF42NE1  | 546650 | 329390 |               | 43.5          | 20.13         | 0             |
| TF42NW10 | 542400 | 328100 |               | 39            | 14.5          | 20.05         |
| TF42SW4  | 542980 | 323260 |               | 33.22         | 14.02         | 17.07         |
| TF42SE23 | 548065 | 320820 |               | 30.1          | 9.4           | 22.1          |
| TF32NW18 | 533910 | 327190 | 2.4           | 0             | 4.5           | 13.7          |
| TF41NW29 | 541500 | 319800 |               | 60            | 0             | 15            |
| TF42SW7  | 542320 | 321200 |               | 59.43         | 0             | 16.76         |
| TF42SW35 | 541360 | 324450 | 5             | 30            | 8.5           | 23.1          |
| TF32SE43 | 538980 | 324890 | 2.3           | 0             | 10.6          | 14.95         |
| TF32SE42 | 538970 | 324870 |               | 0             | 10.7          | 14.8          |
| TF32SE46 | 538940 | 324880 | 2             | 0             | 8.4           | 14            |
| TF32SE45 | 538940 | 324900 | 2.1           | 0             | 10.4          | 14.8          |
| TF32SE44 | 538960 | 324900 | 2.3           | 0             | 10.6          | 14.95         |
| TF42SW11 | 541218 | 324171 | 2.9           | 0             | 8.8           | 15            |
| TF42SW15 | 543638 | 321782 | 2.3           | 0             | 0             | 12            |
| TF42SE11 | 545220 | 322030 | 1.86          | 22            | 0             | 16            |
| TF42SE15 | 546852 | 321109 | 2.8           | 0             | 0             | 12            |
| TF42SE20 | 547259 | 321000 | 3.35          | 0             | 0             | 10.5          |
| TF42SE21 | 548000 | 320830 |               | 0             | 5             | 18.7          |
| TF42SE22 | 548090 | 320916 |               | 28.05         | 0             | 24.8          |
| TF42SE25 | 548130 | 320950 |               | 27.55         | 0             | 22.7          |
| TF42SE4  | 547990 | 321050 | 4.5           | 16            | 0             | 15            |
| TF42SE1  | 548030 | 321110 |               | 20            | 4.6           | 14.6          |
| TF41NE2  | 545080 | 317760 |               | 25.91         | 5.49          | 22.51         |
| TF41NE1  | 545100 | 317700 |               | 0             | 7.62          | 21.34         |
| TF41NE5  | 546450 | 317250 | 3             | 0             | 4.27          | 15.39         |
| TF41NE18 | 546600 | 319230 |               | 22            | 4.5           | 20            |
| TF32SE17 | 536370 | 324720 | 2.75          | 9             | 0             | 0             |
| TF32SE16 | 535900 | 324400 |               | 9.14          | 0             | 3.35          |
| TF41NE6  | 546070 | 317210 |               | 0             | 0             | 18.29         |
| TF41NE7  | 545810 | 317220 | 3.05          | 0             | 5.64          | 12.19         |
| TF41NE8  | 545420 | 317240 | 1.22          | 0             | 0             | 12.19         |
| TF41NE9  | 545080 | 317260 | 3.05          | 0             | 0             | 12.19         |
| TF41NW1  | 544650 | 317280 | 4.57          | 0             | 11.89         | 12.19         |
| TF41NW2  | 544370 | 317290 | 0.91          | 5.49          | 12.19         | 0             |
| TF41NW3  | 544070 | 317310 | 3.05          | 6.1           | 11.89         | 13.14         |
| TF41NW4  | 543710 | 317520 | 1.71          | 0             | 12.19         | 6.71          |
| TF41NW5  | 543370 | 317730 | 3.66          | 5.79          | 15.24         | 8.23          |
| TF41NW6  | 543200 | 317900 | 2.13          | 6.1           | 0             | 10.67         |
| TF41NW7  | 542960 | 318150 | 1.52          | 6.71          | 0             | 13.41         |
| TF41NW8  | 542680 | 318430 | 1.68          | 6.71          | 0             | 13.41         |
| TF41NW9  | 542460 | 318650 | 0.91          | 5.79          | 9.22          | 12.19         |
| TF41NW10 | 542220 | 318900 | 3.05          | 1.68          | 13.72         | 0             |
| TF41NW11 | 541900 | 319220 |               | 5.18          | 11.13         | 12.95         |
| TF41NW12 | 541730 | 319390 | 1.68          | 1.75          | 12.8          | 13.41         |
| TF41NW13 | 541450 | 319680 |               | 5.18          | 0             | 13.41         |

|          |        |        |      |       |       |       |
|----------|--------|--------|------|-------|-------|-------|
| TF41NW14 | 541230 | 319900 |      | 1.52  | 12.19 | 0     |
| TF42SW1  | 541010 | 320110 | 2.44 | 2.29  | 4.27  | 12.19 |
| TF42SW2  | 540660 | 320240 | 1.52 | 0     | 10.36 | 12.19 |
| TF42SW3  | 540270 | 320380 | 1.52 | 0     | 7.92  | 12.19 |
| TF32SE1  | 539940 | 320500 |      | 1.22  | 0     | 12.19 |
| TF32SE2  | 539540 | 320630 | 1.68 | 0     | 6.1   | 12.95 |
| TF32SE3  | 539230 | 320740 | 2.13 | 0     | 12.19 | 0     |
| TF32SE4  | 538880 | 320860 | 2.13 | 2.44  | 0     | 14.17 |
| TF32SE5  | 538680 | 320970 | 1.45 | 6.25  | 8.84  | 12.42 |
| TF32SE6  | 538240 | 321090 | 1.83 | 0     | 12.19 | 0     |
| TF32SE12 | 537870 | 321220 |      | 12.19 | 10.36 | 0     |
| TF32SE7  | 537590 | 321310 | 2.13 | 12.19 | 4.57  | 10.06 |
| TF32SE8  | 537290 | 321420 | 1.83 | 3.89  | 7.92  | 12.19 |
| TF32SE9  | 537020 | 321510 | 1.83 | 1.37  | 4.88  | 12.19 |
| TF32SE10 | 536750 | 321750 |      | 2.13  | 8.84  | 12.19 |
| TF32SE11 | 536430 | 322020 | 1.83 | 0     | 12.19 | 0     |
| TF32SE13 | 535850 | 322520 | 1.52 | 1.98  | 4.27  | 12.19 |
| TF32SE14 | 535550 | 322780 |      | 1.83  | 7.16  | 12.8  |
| TF32SE15 | 535240 | 323050 | 1.83 | 2.51  | 12.19 | 0     |
| TF32SW7  | 534980 | 323270 | 1.22 | 0     | 12.19 | 0     |
| TF32SW2  | 534660 | 323560 |      | 7.16  | 0     | 12.5  |
| TF32SW3  | 534460 | 323740 | 1.83 | 6.25  | 12.95 | 0     |
| TF32SW4  | 534310 | 324070 | 2.13 | 0     | 12.19 | 0     |
| TF32SW5  | 534190 | 324340 |      | 0     | 12.19 | 0     |
| TF32SW6  | 534070 | 324640 | 0.91 | 0     | 2.74  | 12.19 |
| TF32NW1  | 533810 | 325230 | 1.83 | 0     | 12.19 | 0     |
| TF32NW2  | 533470 | 325350 | 1.83 | 0     | 3.05  | 12.19 |
| TF32NW3  | 533190 | 325440 | 1.83 | 3.05  | 12.19 | 0     |
| TF32NW4  | 532880 | 325550 |      | 0     | 12.19 | 0     |
| TF32NW5  | 532580 | 325650 |      | 3.05  | 0     | 12.19 |
| TF32NW7  | 531950 | 325880 | 1.22 | 0     | 1.98  | 12.19 |
| TF32NW8  | 531710 | 326190 |      | 0     | 2.13  | 12.19 |
| TF32NW9  | 531470 | 326510 | 1.52 | 0     | 1.07  | 11.13 |
| TF32NW10 | 531230 | 326810 | 1.52 | 0     | 0     | 12.19 |
| TF32NW11 | 531010 | 327090 |      | 0     | 0     | 12.19 |
| TF32NW6  | 530790 | 327410 | 2.13 | 1.22  | 0     | 11.89 |
| TF32NW14 | 530570 | 327700 | 1.83 | 0     | 0     | 12.5  |
| TF32NW12 | 530350 | 327970 | 1.52 | 0     | 2.13  | 12.27 |
| TF32NW13 | 530130 | 328250 | 2.13 | 0     | 0     | 12.19 |
| TF22NE9  | 529940 | 328500 | 1.52 | 0     | 5.41  | 12.14 |
| TF22NE10 | 529710 | 328800 |      | 0     | 1.83  | 12.19 |
| TF22NE13 | 529050 | 329660 |      | 1.22  | 0     | 12.19 |
| TF22NE12 | 528970 | 329990 | 0.91 | 0     | 3.05  | 12.19 |
| TF23SE10 | 528660 | 330190 | 1.52 | 0     | 0     | 12.19 |
| TF22NE72 | 529400 | 325244 | 0.91 | 14.5  | 0     | 17    |
| TF22NE71 | 528992 | 325255 | 1.52 | 13    | 0     | 0     |
| TF22SE62 | 528387 | 324781 | 2    | 13.7  | 0     | 16.5  |
| TF22SE61 | 528079 | 324481 | 2.3  | 12    | 0     | 15.8  |
| TF22SE4  | 526490 | 323240 | 9    | 18    | 0     | 0     |
| TF22SE56 | 526440 | 323600 | 11.8 | 2.5   | 0     | 10    |

|                   |        |        |      |       |      |       |
|-------------------|--------|--------|------|-------|------|-------|
| <b>TF22SE27</b>   | 526270 | 323780 |      | 3.96  | 0    | 15.54 |
| <b>TF22SE28</b>   | 526200 | 323830 | 3.5  | 3.96  | 0    | 15.85 |
| <b>TF22SE26</b>   | 526120 | 322840 | 3.04 | 10.97 | 0    | 14.33 |
| <b>TF32SW1</b>    | 530520 | 324650 | 4.15 | 22.25 | 0    | 14.33 |
| <b>TF22SE8</b>    | 528420 | 321800 | 5.47 | 0     | 0    | 7     |
| <b>TF32SE36</b>   | 538590 | 320550 | 2.13 | 3.05  | 0    | 15.72 |
| <b>TF31NE8</b>    | 538550 | 319220 |      | 16.5  | 0    | 13.3  |
| <b>TF31NE7</b>    | 538600 | 319130 |      | 0     | 0    | 9     |
| <b>TF31NE5</b>    | 539550 | 319530 |      | 7     | 0    | 18.9  |
| <b>TF31NE6</b>    | 539570 | 319540 |      | 7.1   | 0    | 15    |
| <b>TF41NW16</b>   | 543620 | 316560 |      | 9.14  | 0    | 19.51 |
| <b>TF41SE4</b>    | 545670 | 313770 |      | 0     | 0    | 10.59 |
| <b>TF41NE60</b>   | 546272 | 316191 |      | 23.8  | 0    | 21.05 |
| <b>TF41NE51</b>   | 546057 | 316256 |      | 0     | 0    | 10.65 |
| <b>TF41NE55</b>   | 546186 | 316083 | 3.2  | 0     | 0    | 10.65 |
| <b>TF41NE62</b>   | 546333 | 316247 | 3.05 | 0     | 0    | 10.65 |
| <b>TF41NE54</b>   | 546193 | 316283 | 3.05 | 0     | 0    | 18    |
| <b>TF41NE56</b>   | 546192 | 316159 | 3.2  | 0     | 0    | 11.9  |
| <b>TF33SW1</b>    | 531740 | 332260 | 3.05 | 12.5  | 0    | 15.24 |
| <b>TF41NW15/A</b> | 542570 | 315530 | 3.65 | 9.14  | 0    | 21.44 |
| <b>TF42NE15</b>   | 549300 | 325600 |      | 44.5  | 0    | 28.6  |
| <b>TF42NE5</b>    | 549520 | 326320 | 3.66 | 2.29  | 0    | 6.25  |
| <b>TF42NE2</b>    | 549980 | 327120 | 3.15 | 24.2  | 0    | 16.75 |
| <b>TF42SW2</b>    | 543930 | 331800 |      | 0     | 0    | 21.4  |
| <b>TF42NW2</b>    | 541900 | 326510 |      | 0     | 1.94 | 18.4  |

Section B1: Inferred Water Level, Freshwater-Saline Boundary and Freshwater Lens in the Winter Season

| Site  | Corresponding BGS core | Lon    | Lat    | Elevation (MSL) | Water Level (m bgl) | Saline Level (m bgl) | Water Level (MSL) | Saline Level (MSL) | Freshwater Thickness (m) |
|-------|------------------------|--------|--------|-----------------|---------------------|----------------------|-------------------|--------------------|--------------------------|
| MM01  | TF42NE1                | 546835 | 329533 | 3.6             | 2.25                | 2.875                | 1.35              | 0.725              | 0.625                    |
| MM02  | TF43SW2                | 543869 | 331928 | 3.2             | 2                   | 2.875                | 1.2               | 0.325              | 0.875                    |
| MM03  | TF43SW1                | 541298 | 332091 | 3.9             | 2                   | 3.25                 | 1.9               | 0.65               | 1.25                     |
| MM04  | N/A                    | 538907 | 333788 | 2.4             | 2.25                | 3.25                 | 0.15              | -0.85              | 1                        |
| MM05  | TF42NE5                | 549465 | 326007 | 3.1             | 2.625               | 4.25                 | 0.475             | -1.15              | 1.625                    |
| MM06  | TF42NE15               | 549385 | 325460 | 3.3             | 3                   | 4.75                 | 0.3               | -1.45              | 1.75                     |
| MM07  | N/A                    | 544708 | 324856 | 3.4             | 2.75                | 5                    | 0.65              | -1.6               | 2.25                     |
| MM08  | TF42NW10               | 543157 | 327331 | 3.6             | 2.875               | 4.75                 | 0.725             | -1.15              | 1.875                    |
| MM09  | N/A                    | 538456 | 329496 | 3.1             | 3.25                | 5.25                 | -0.15             | -2.15              | 2                        |
| MM10  | TF33SW11               | 533738 | 331501 | 3.8             | 3.125               | 5.5                  | 0.675             | -1.7               | 2.375                    |
| MM11  | TF33SW1                | 532391 | 331995 | 3.5             | 2.875               | 5.375                | 0.625             | -1.875             | 2.5                      |
| MM13  | TF42SE21               | 547819 | 320649 | 4.1             | 2                   | 3.75                 | 2.1               | 0.35               | 1.75                     |
| MM14  | TF42SE11               | 544849 | 321845 | 3.4             | 1.75                | 3.75                 | 1.65              | -0.35              | 2                        |
| MM15  | TF42SW4                | 542407 | 323446 | 2.8             | 3.25                | 5.625                | -0.45             | -2.825             | 2.375                    |
| MM16  | TF32NW18               | 533435 | 328227 | 4               | 2.625               | 4.75                 | 1.375             | -0.75              | 2.125                    |
| MM17  | TF42SW35               | 541210 | 324146 | 3               | 4.25                | 5.5                  | -1.25             | -2.5               | 1.25                     |
| MM18  | TF32SE42               | 539327 | 324683 | 2.9             | 3.25                | 5.25                 | -0.35             | -2.35              | 2                        |
| MM19a | TF41SE4                | 544237 | 313368 | 4.5             | 3.5                 | 6.75                 | 1                 | -2.25              | 3.25                     |
| MM19b | TF41SE4                | 544629 | 313785 | 4.2             | 3.625               | 6.75                 | 0.575             | -2.55              | 3.125                    |
| MM20  | TF41NW15/A             | 544206 | 316687 | 2.4             | 3.625               | 5.25                 | -1.225            | -2.85              | 1.625                    |
| MM23  | TF31NW7                | 533911 | 319582 | 3.1             | 4.75                | 6.75                 | -1.65             | -3.65              | 2                        |
| MM25  | TF22SE26               | 525951 | 321761 | 1.6             | 5.25                |                      | -3.65             | -4.65              |                          |
| MM27  | TF41NE5                | 545571 | 317371 | 3.9             | 3.25                | 4.75                 | 0.65              | -0.85              | 1.5                      |
| MM28  | TF41NW4                | 544245 | 317468 | 3               | 2.625               | 3.75                 | 0.375             | -0.75              | 1.125                    |
| MM29  | TF42SW1                | 540836 | 320187 | 2.6             | 1.75                | 4.75                 | 0.85              | -2.15              | 3                        |
| MM30  | TF32SE7                | 539648 | 321467 | 2.6             | 1.875               | 4.25                 | 0.725             | -1.65              | 2.375                    |
| MM31  | TF32SW3                | 534415 | 323631 | 2.3             | 1.625               | 4.25                 | 0.675             | -1.95              | 2.625                    |
| MM32  | TF32NW8                | 532706 | 326699 | 3               | 2                   | 4.5                  | 1                 | -1.5               | 2.5                      |

Section B2: Inferred Water Level, Freshwater-Saline Boundary and Freshwater Lens in the Summer Season

| Site  | Core       | Lon    | Lat    | Elevation (MSL) | Water Level (m bgl) | Saline Level (m bgl) | Water Level (MSL) | Saline Level (MSL) | Freshwater Thickness (m) |
|-------|------------|--------|--------|-----------------|---------------------|----------------------|-------------------|--------------------|--------------------------|
| MM01  | TF42NE1    | 546835 | 329533 | 3.6             | 2                   | 3.125                | 1.6               | 0.475              | 1.125                    |
| MM02  | TF43SW2    | 543869 | 331928 | 3.2             | 2.125               | 3.05                 | 1.075             | 0.15               | 0.925                    |
| MM03  | TF43SW1    | 541298 | 332091 | 3.9             | 1.925               | 3.125                | 1.975             | 0.775              | 1.2                      |
| MM04  | N/A        | 538907 | 333788 | 2.4             | 2.05                | 3.125                | 0.35              | -0.725             | 1.075                    |
| MM05  | TF42NE5    | 549465 | 326007 | 3.1             | 2.175               | 3.475                | 0.925             | -0.375             | 1.3                      |
| MM06  | TF42NE15   | 549385 | 325460 | 3.3             | 2.45                | 3.55                 | 0.85              | -0.25              | 1.1                      |
| MM07  | N/A        | 544708 | 324856 | 3.4             | 2.85                | 4.45                 | 0.55              | -1.05              | 1.6                      |
| MM08  | TF42NW10   | 543157 | 327331 | 3.6             | 3.125               | 4.75                 | 0.475             | -1.15              | 1.625                    |
| MM09  | N/A        | 538456 | 329496 | 3.1             | 3.25                | 5.25                 | -0.15             | -2.15              | 2                        |
| MM10  | TF33SW11   | 533738 | 331501 | 3.8             | 2.875               | 5                    | 0.925             | -1.2               | 2.125                    |
| MM11  | TF33SW1    | 532391 | 331995 | 3.5             | 3                   | 4.75                 | 0.5               | -1.25              | 1.75                     |
| MM13  | TF42SE21   | 547819 | 320649 | 4.1             | 3.375               | 5.25                 | 0.725             | -1.15              | 1.875                    |
| MM14  | TF42SE11   | 544849 | 321845 | 3.4             | 3.375               | 5.75                 | 0.025             | -2.35              | 2.375                    |
| MM15  | TF42SW4    | 542407 | 323446 | 2.8             | 3.075               | 5.375                | -0.275            | -2.575             | 2.3                      |
| MM16  | TF32NW18   | 533435 | 328227 | 4               | 2.2                 | 3.925                | 1.8               | 0.075              | 1.725                    |
| MM17  | TF42SW35   | 541210 | 324146 | 3               | 1.875               | 4                    | 1.125             | -1                 | 2.125                    |
| MM18  | TF32SE42   | 539327 | 324683 | 2.9             | 3.25                | 5.625                | -0.35             | -2.725             | 2.375                    |
| MM19a | TF41SE4    | 544237 | 313368 | 4.5             | 2.75                | 4.75                 | 1.75              | -0.25              | 2                        |
| MM20  | TF41NW15/A | 544206 | 316687 | 2.4             | 3.425               | 5.25                 | -1.025            | -2.85              | 1.825                    |
| MM23  | TF31NW7    | 533911 | 319582 | 3.1             | 3.625               | 6.75                 | -0.525            | -3.65              | 3.125                    |
| MM25  | TF22SE26   | 525951 | 321761 | 1.6             | 3.6                 | 6.25                 | -2                | -4.65              | 2.65                     |
| MM27  | TF41NE5    | 545571 | 317371 | 3.9             | 3.625               | 5.25                 | 0.275             | -1.35              | 1.625                    |
| MM28  | TF41NW4    | 544245 | 317468 | 3               | 4.5                 | 6.5                  | -1.5              | -3.5               | 2                        |
| MM29  | TF42SW1    | 540836 | 320187 | 2.6             | 5.25                | 6                    | -2.65             | -3.4               | 0.75                     |
| MM30  | TF32SE7    | 539648 | 321467 | 2.6             | 3.5                 | 5                    | -0.9              | -2.4               | 1.5                      |
| MM32  | TF32NW8    | 532706 | 326699 | 3               | 2                   | 4.75                 | 1                 | -1.75              | 2.75                     |

## Section C: Geostatistical Analysis R Code

```
library(sp)
library(automap)
library(raster)

#Reads in the excel spreadsheet containing ERT raw results
Holbeach <- read.csv(file="Raw_ERT_Results", head=TRUE) #converts x y data in the excel spreadsheet into
coordinates coordinates(Holbeach) = ~x+y

#Creates a grid within the coordinates displayed with a resolution of 50x50m
x.range <- as.integer(range(Holbeach@coords[,1]))
y.range <- as.integer(range(Holbeach@coords[,2]))
x.range <- as.integer(c(524749.9, 550670.1))
y.range <- as.integer(c(312453.9, 335566.1))
grd <- expand.grid(x=seq(from=x.range[1], to=x.range[2], by=50), y=seq(from=y.range[1], to=y.range[2],
by=50)) coordinates(grd) <- ~x+y gridded(grd) <- TRUE

#Kriges the ERT raw point data with one of the 3 models defined here
Water_Raster <- autoKrige(ERT_Raw_Depth_Data~1, Holbeach, grd, model = c("Sph","Exp","Gau"))
plot(Water_Raster) summary(Water_Raster)

str(Water_Raster)
data<-data.frame(Water_Raster$krige_output@coords, Water_Raster$krige_output@data$var1.pred,
Water_Raster$krige_output@data$var1.var,
Water_Raster$krige_output@data$var1.stdev) names(data)<-c("x","y","pred","var","stdev") head(data)
coordinates(data) = ~x+y gridded(data)<-TRUE dat_rast<- raster(data)

writeRaster(dat_rast, filename = "Raster_File_Name",overwrite=TRUE)
```

Section D: Winter ERT Survey Scans

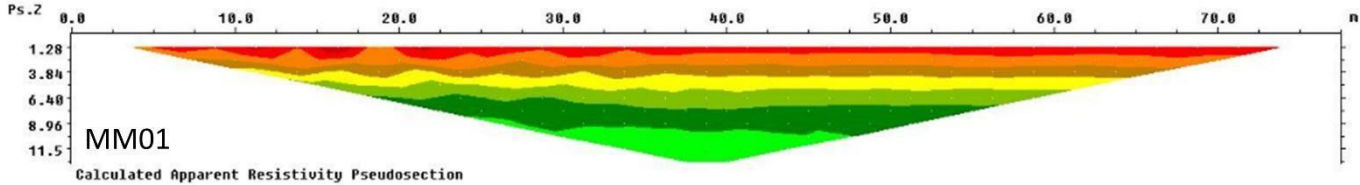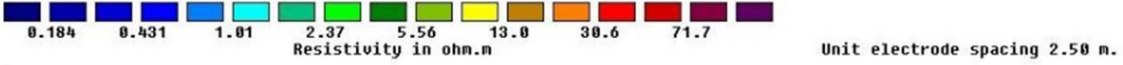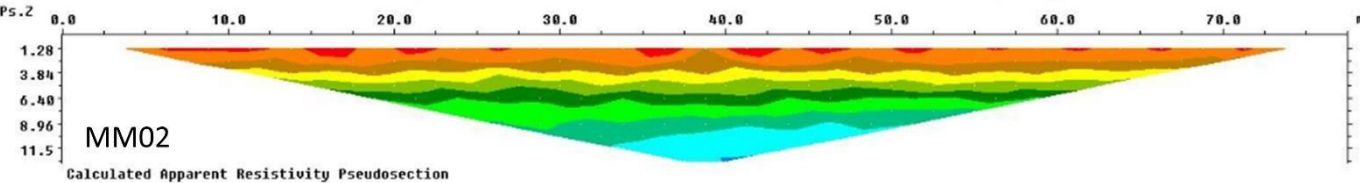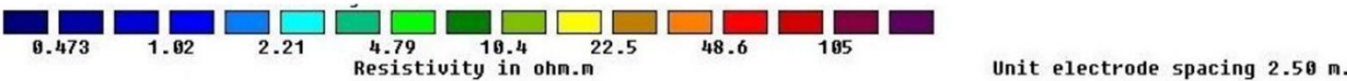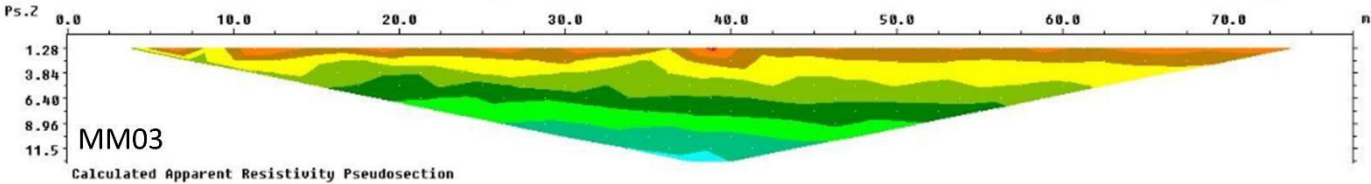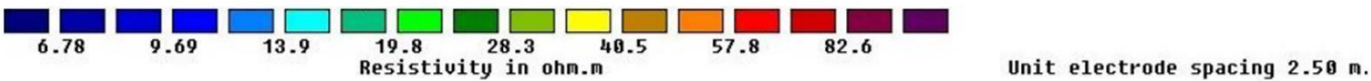



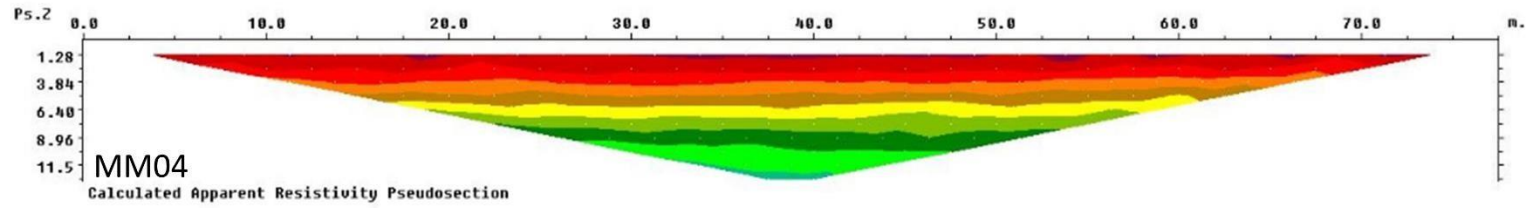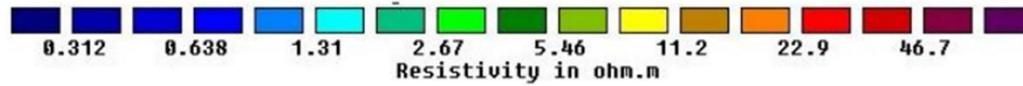

Unit electrode spacing 2.50 m.

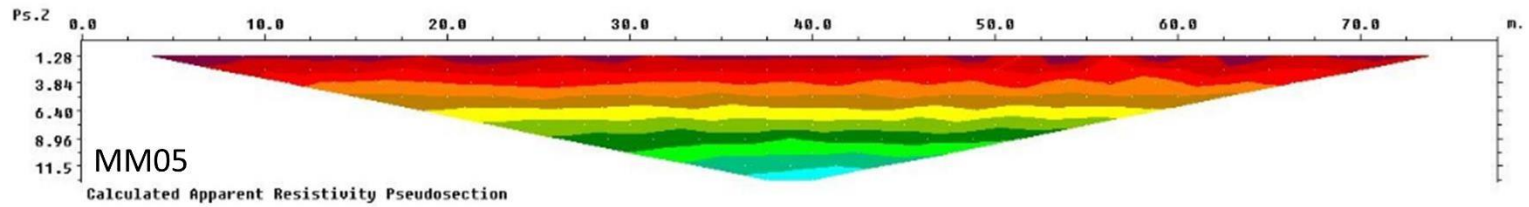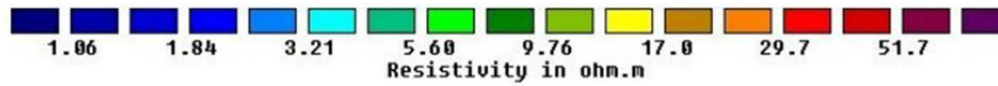

Unit electrode spacing 2.50 m.

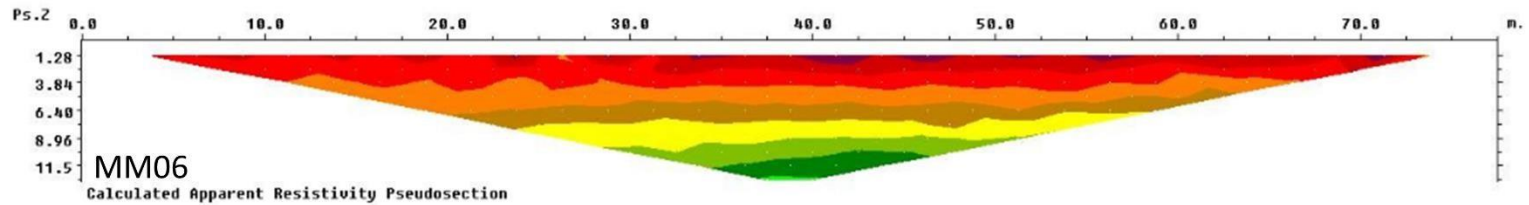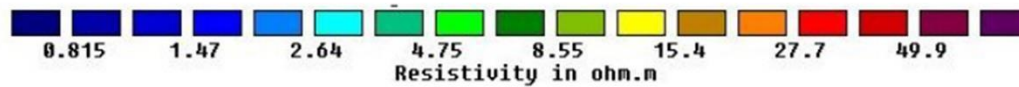

Unit electrode spacing 2.50 m.

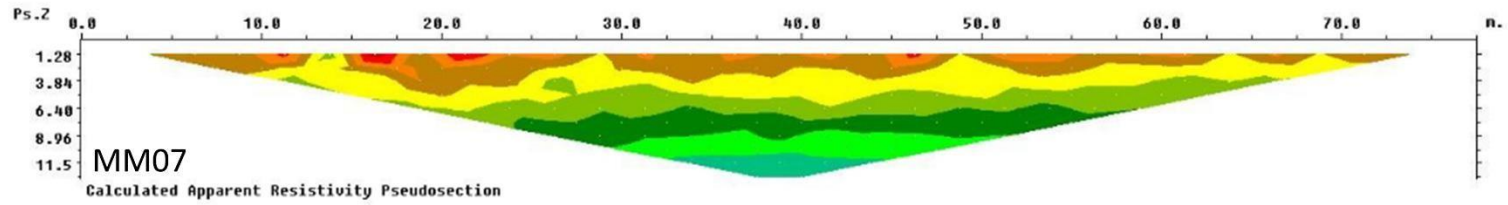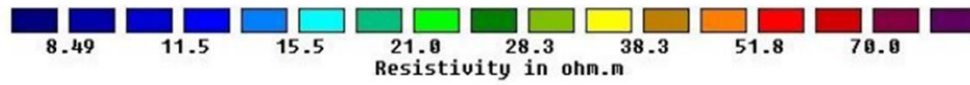

Unit electrode spacing 2.50 m.

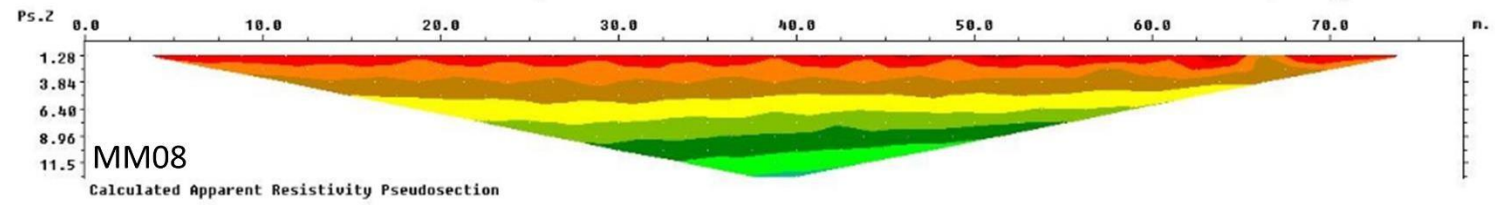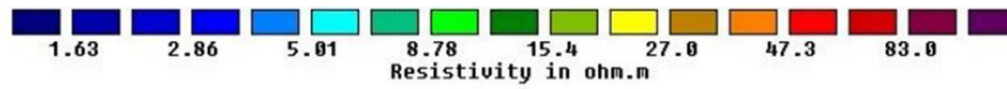

Unit electrode spacing 2.50 m.

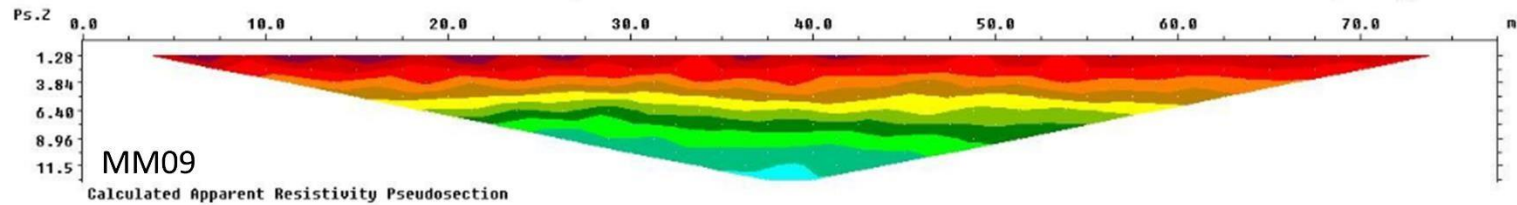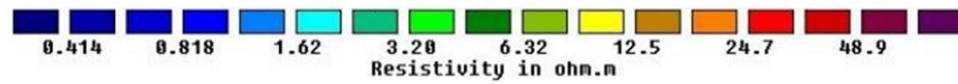

Unit electrode spacing 2.50 m.

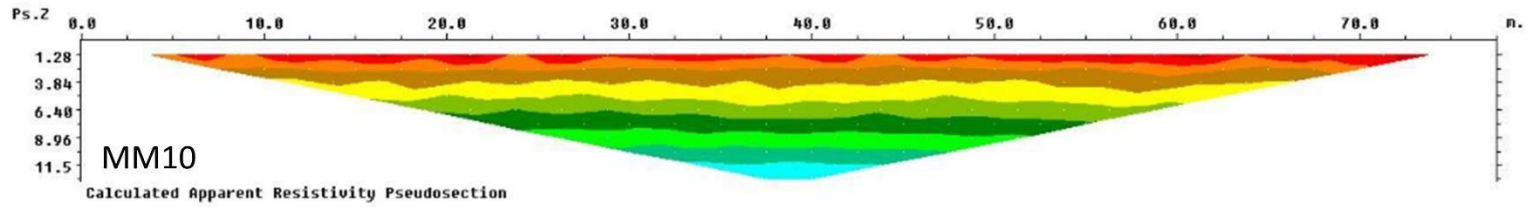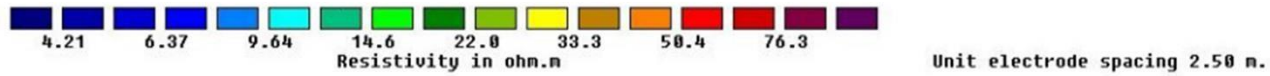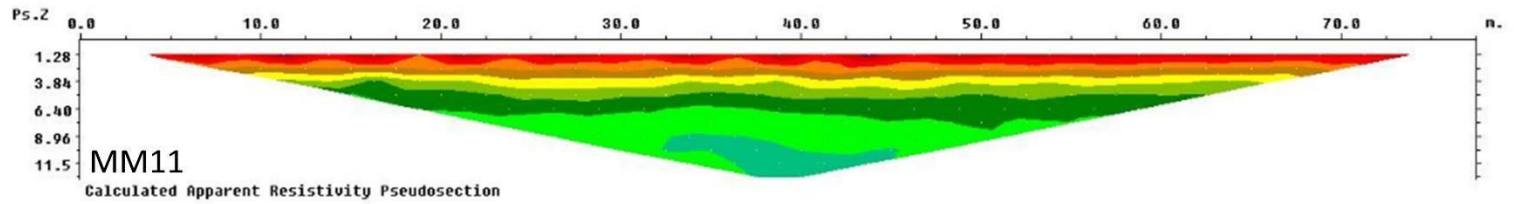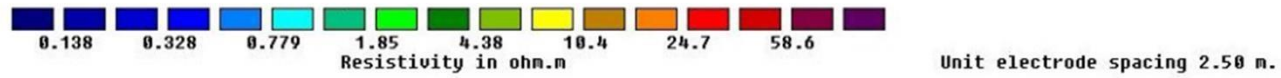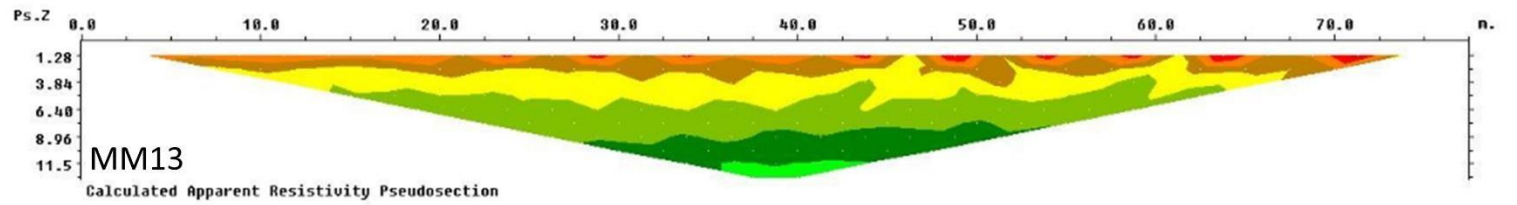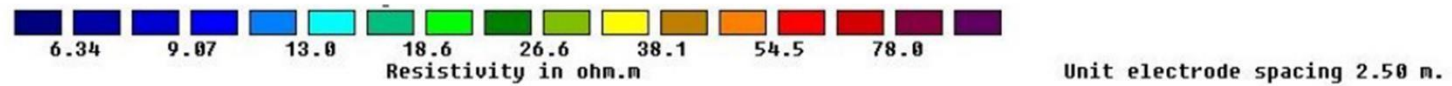

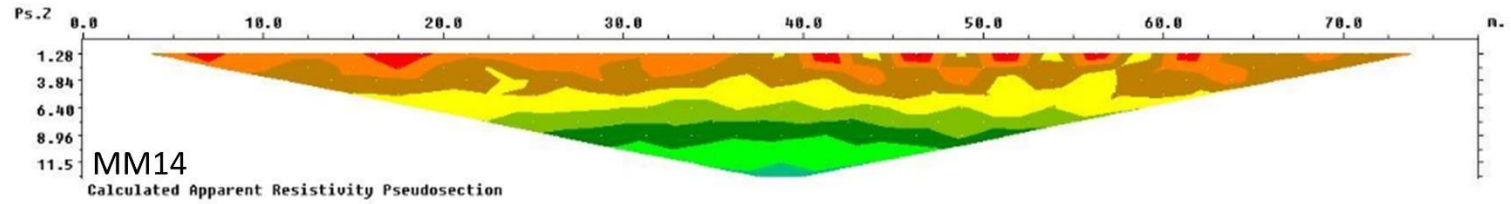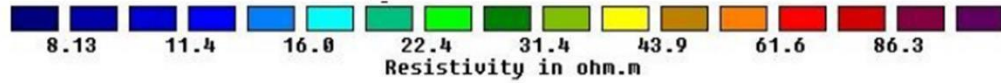

Unit electrode spacing 2.50 m.

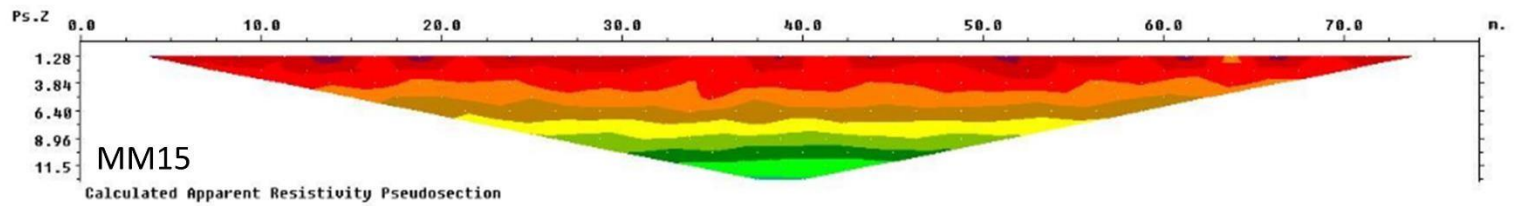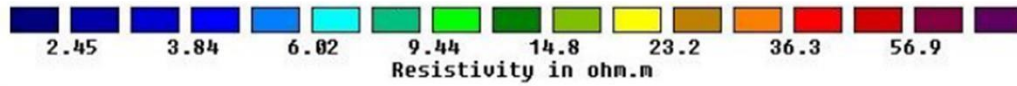

Unit electrode spacing 2.50 m.

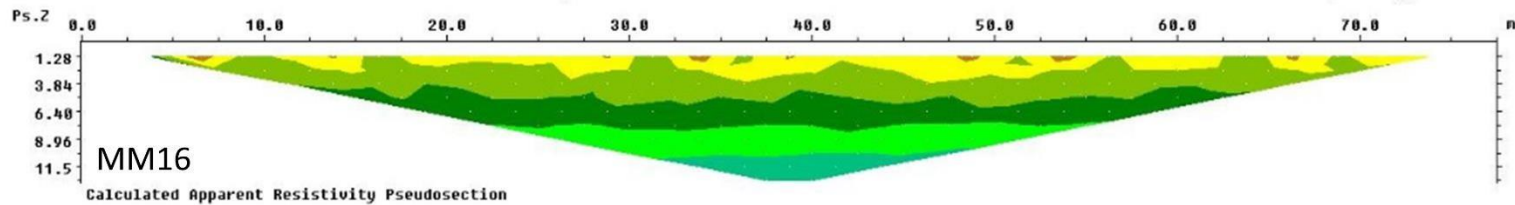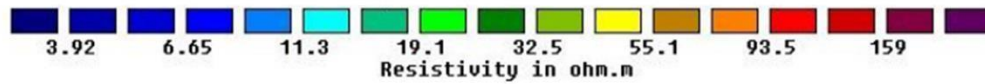

Unit electrode spacing 2.50 m.



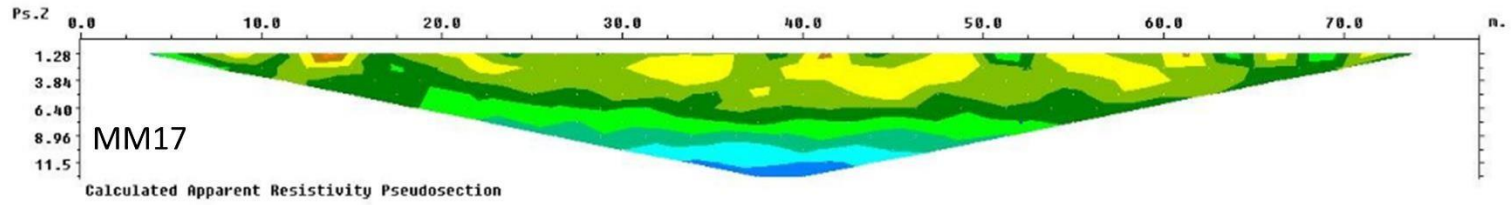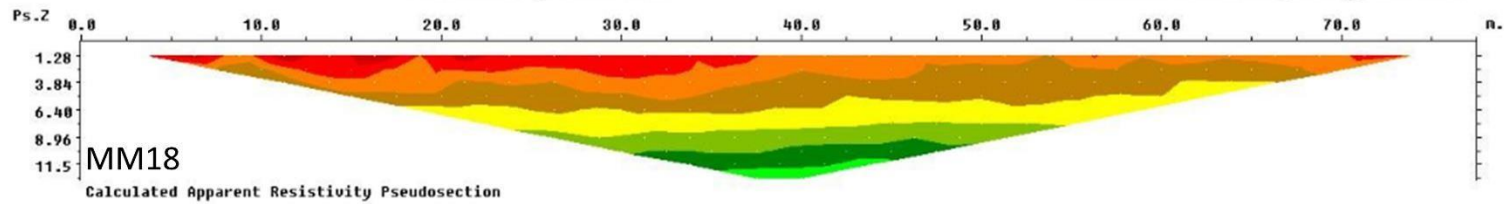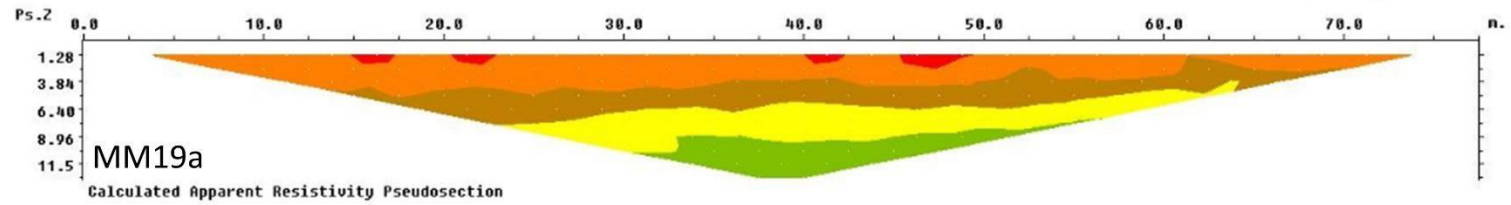

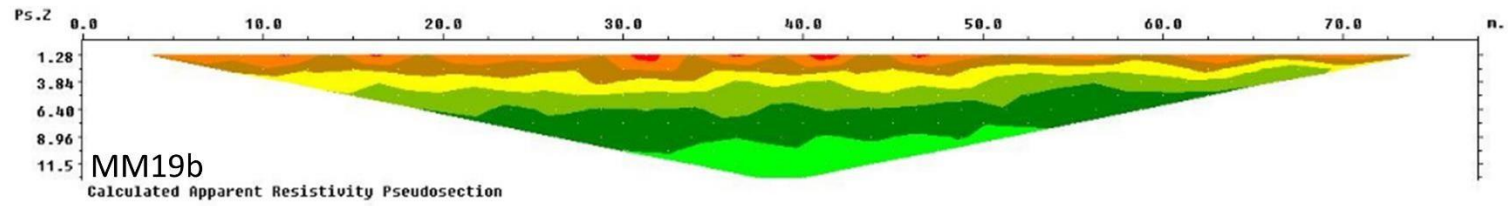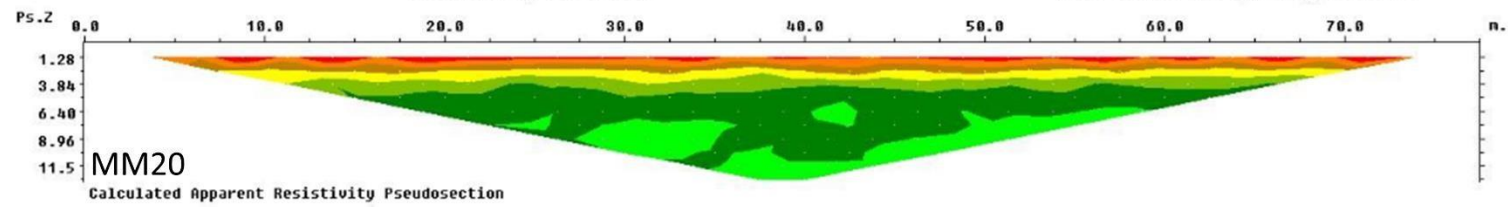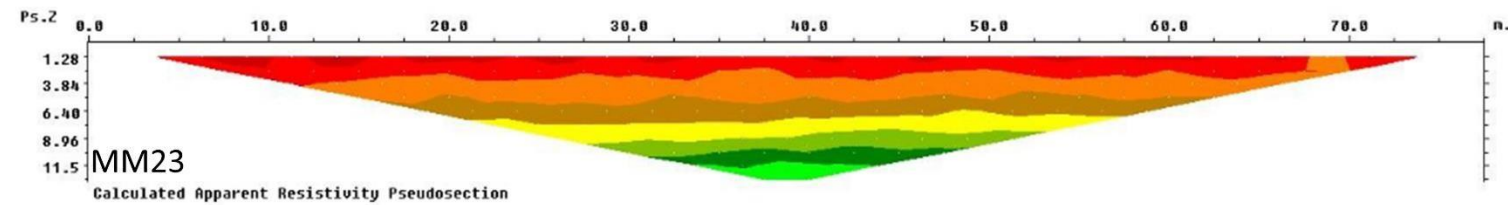

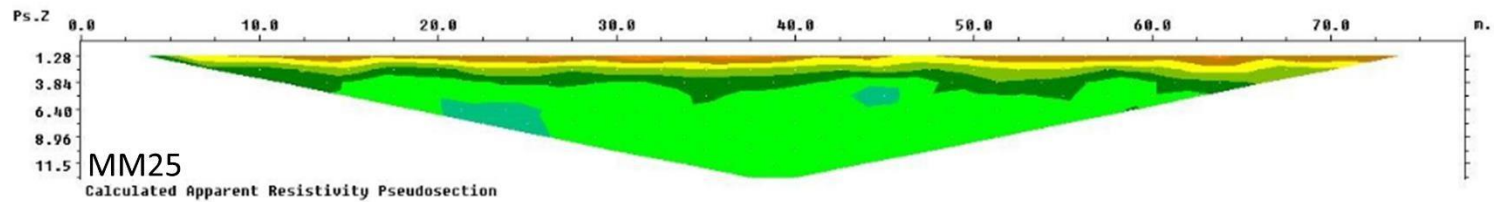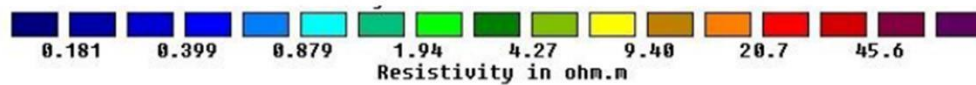

Unit electrode spacing 2.50 m.

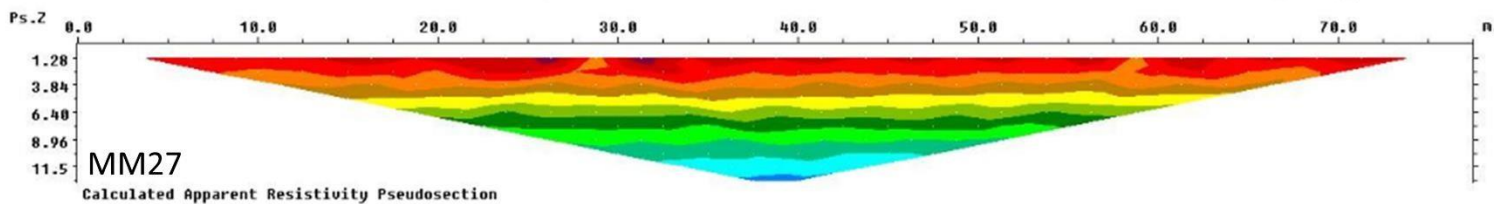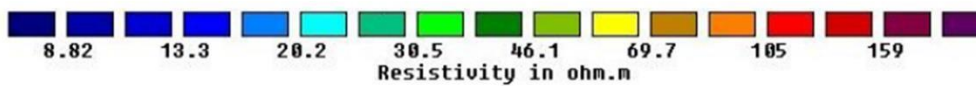

Unit electrode spacing 2.50 m.

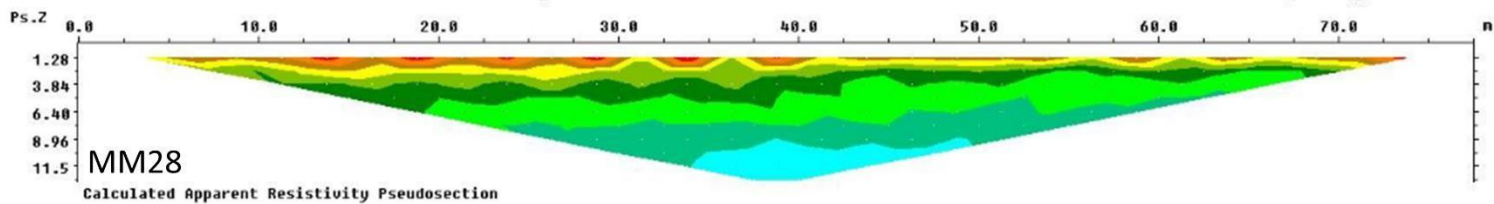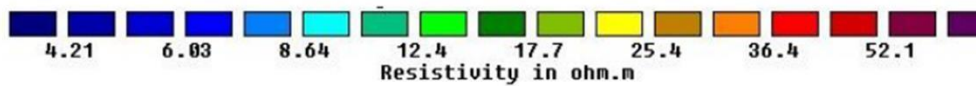

Unit electrode spacing 2.50 m.

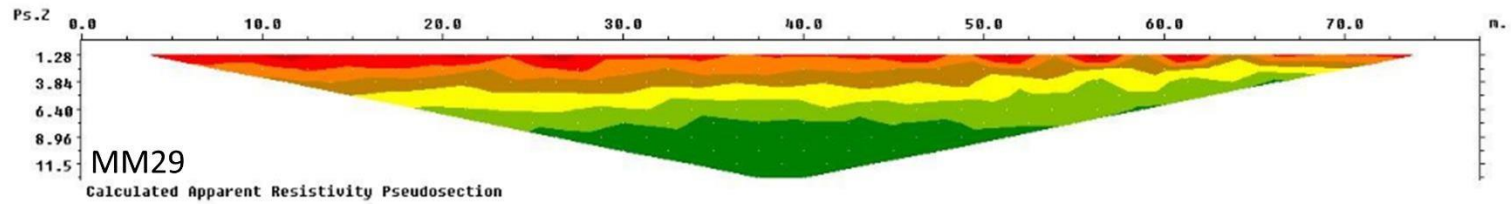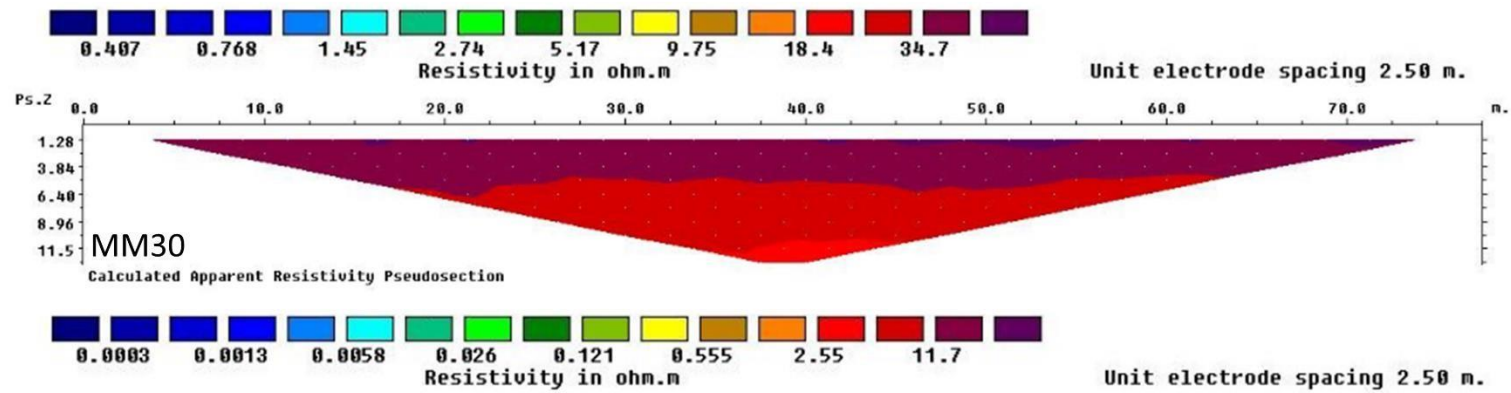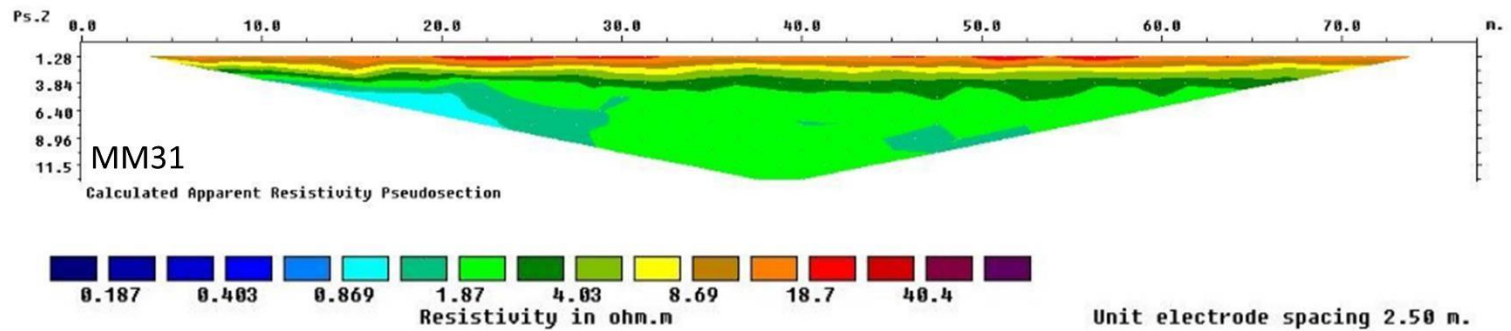



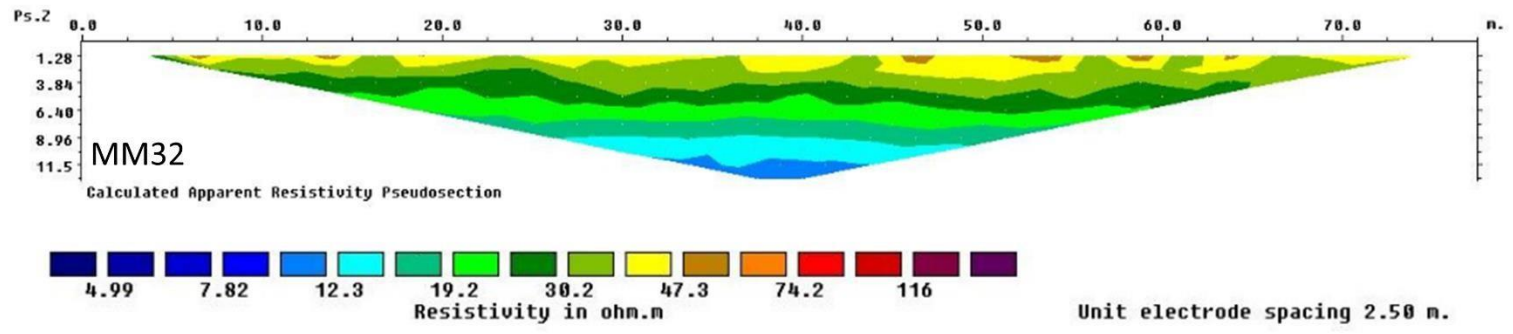

Section E: Summer ERT Survey Scans

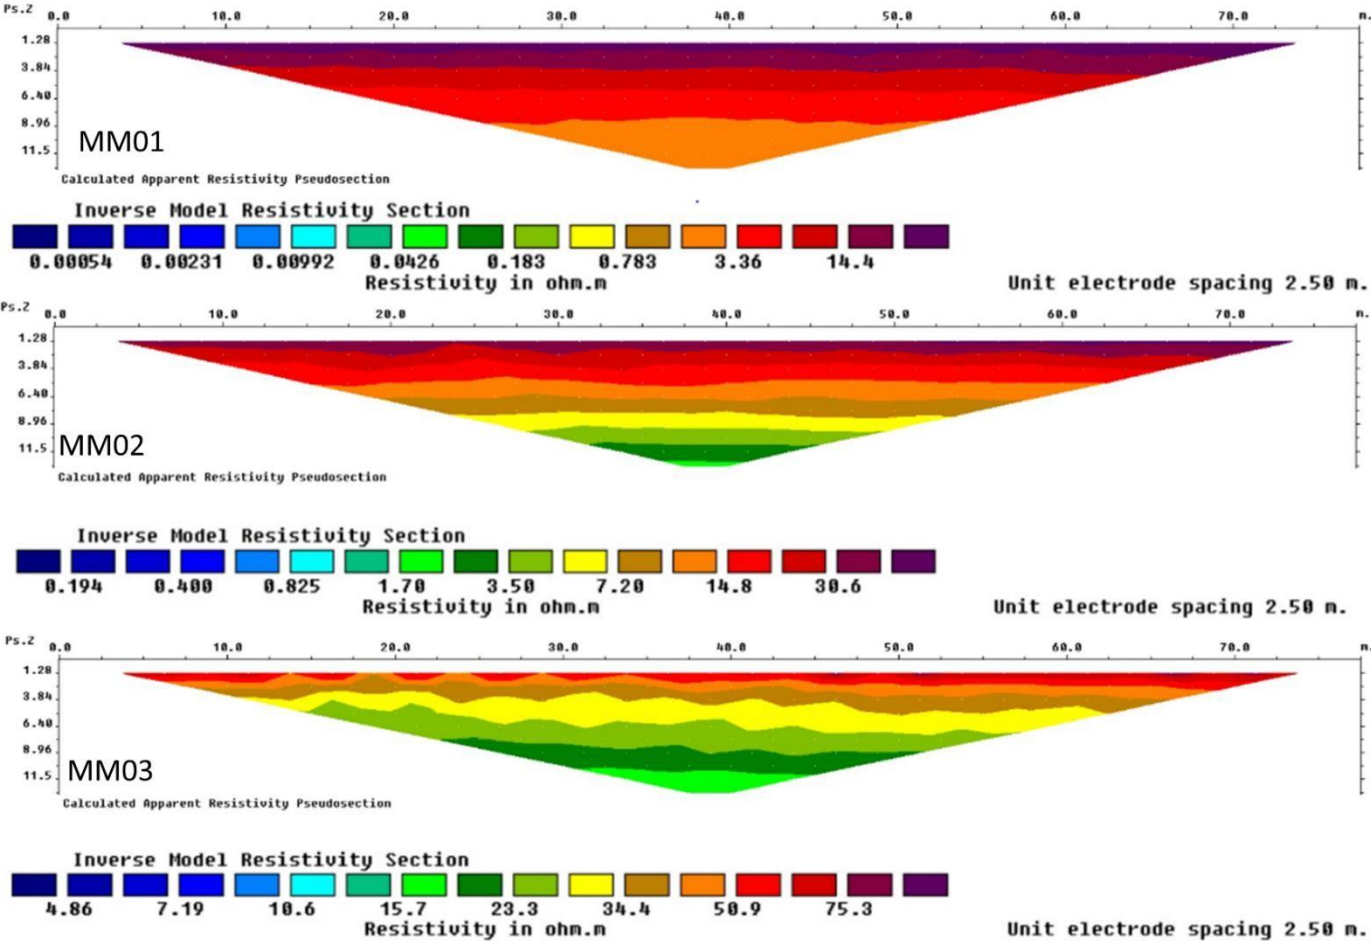

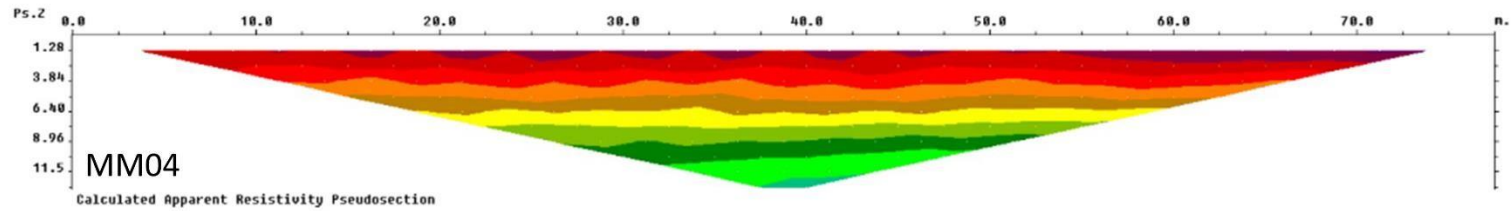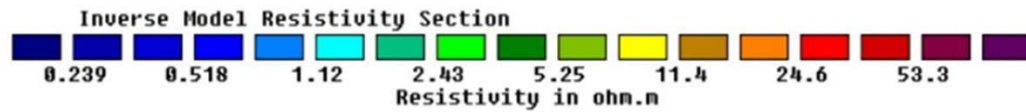

Unit electrode spacing 2.50 m.

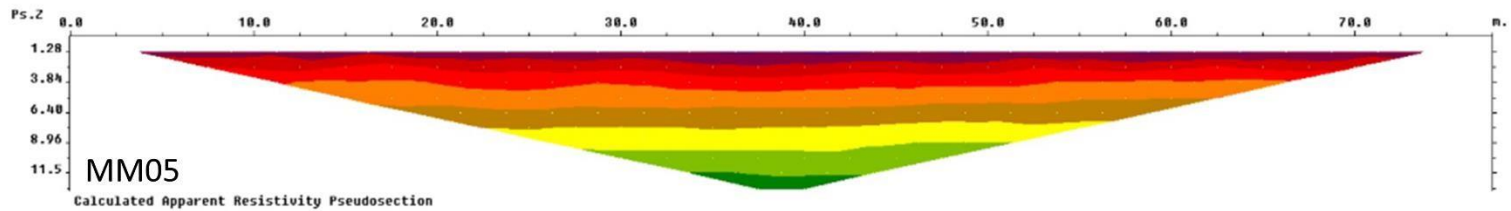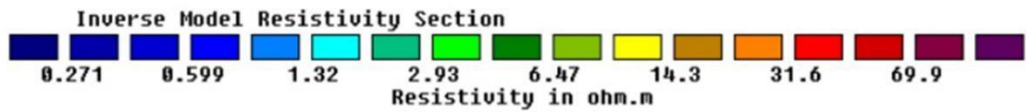

Unit electrode spacing 2.50 m.

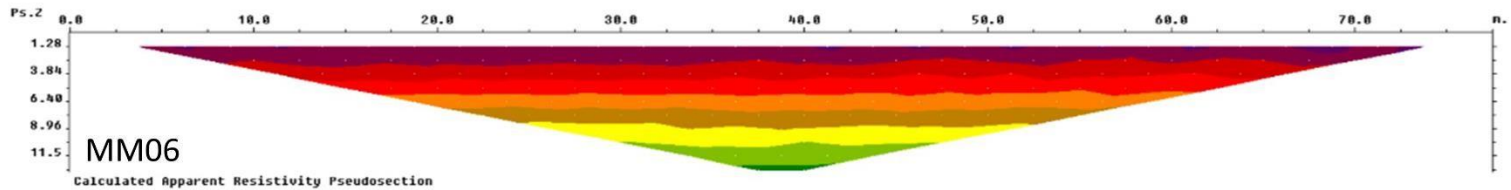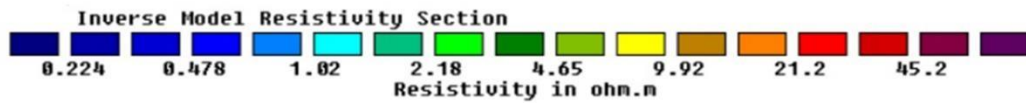

Unit electrode spacing 2.50 m.

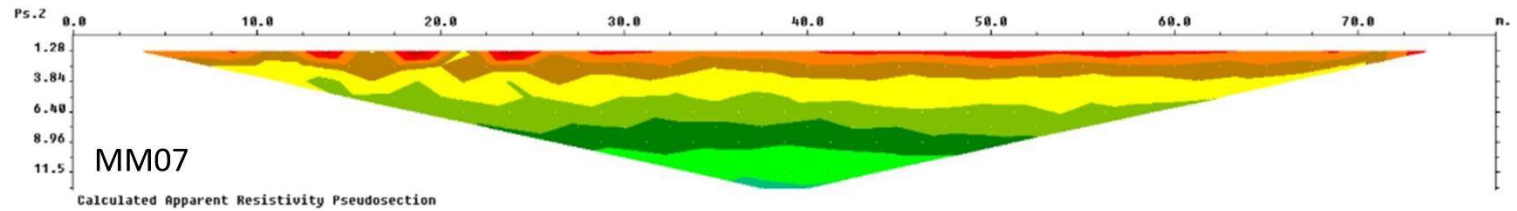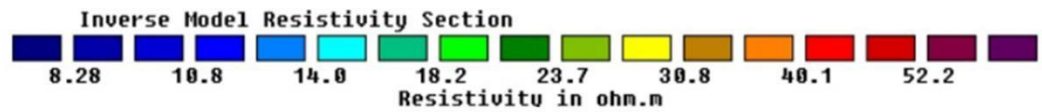

Unit electrode spacing 2.50 m.

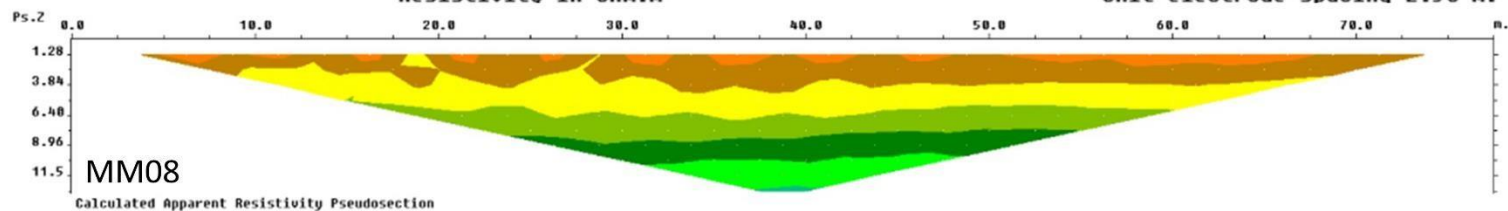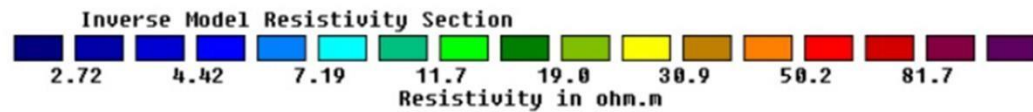

Unit electrode spacing 2.50 m.

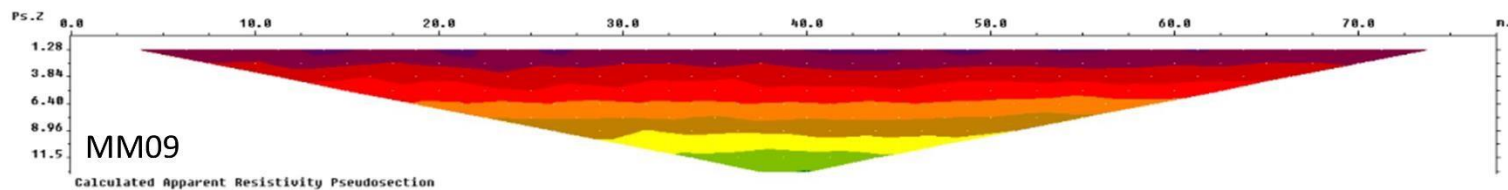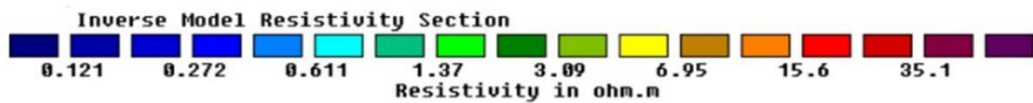

Unit electrode spacing 2.50 m.

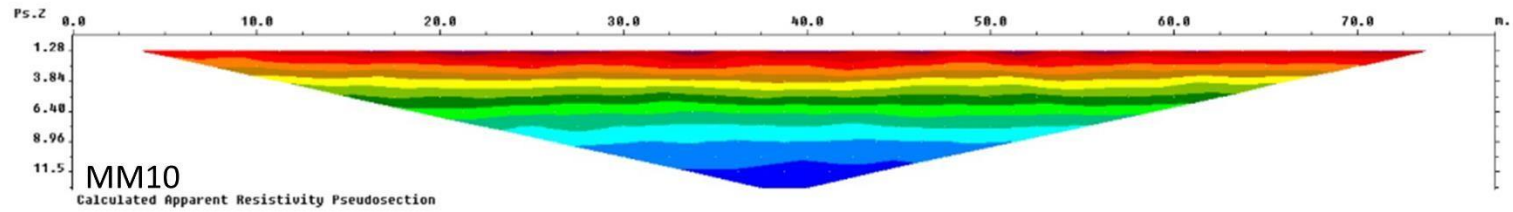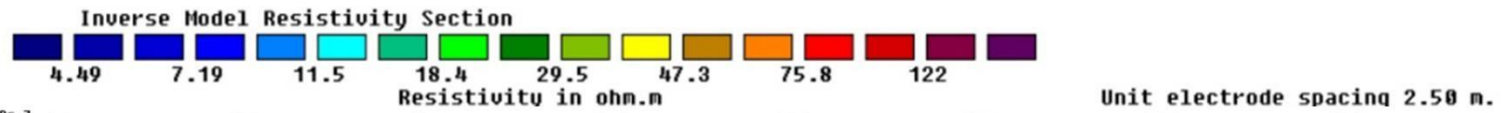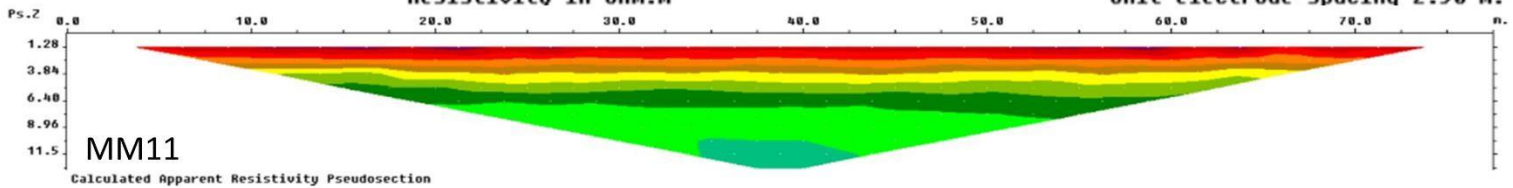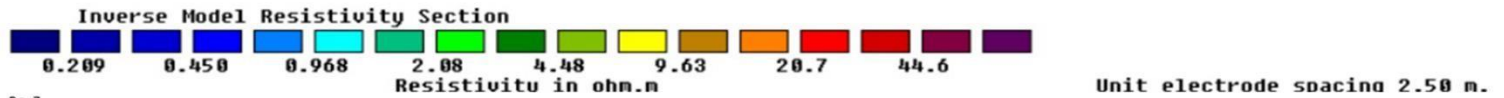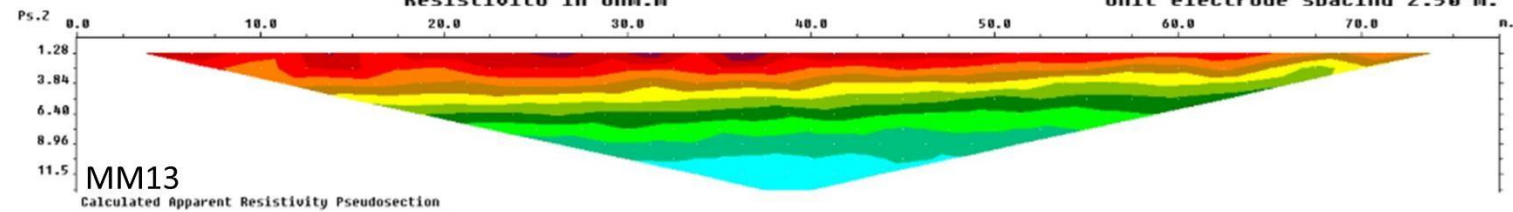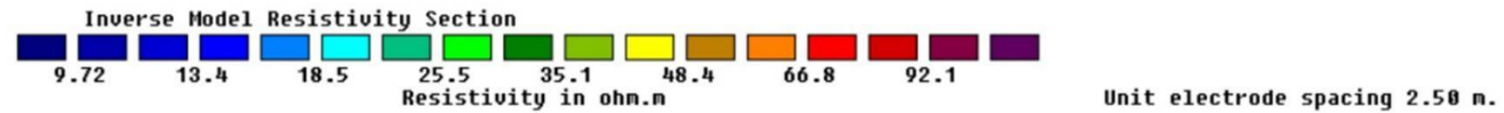

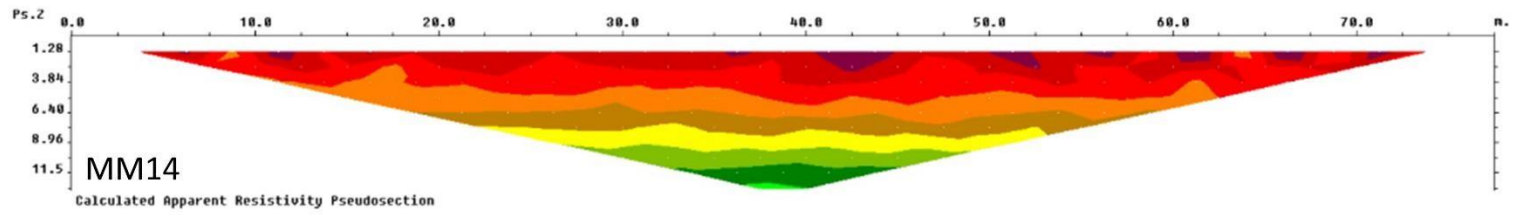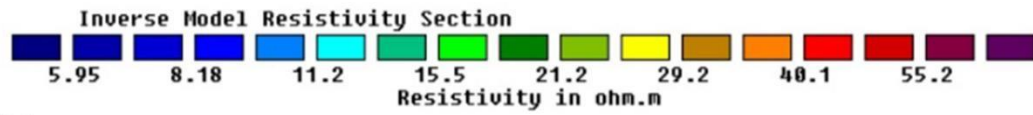

Unit electrode spacing 2.50 m.

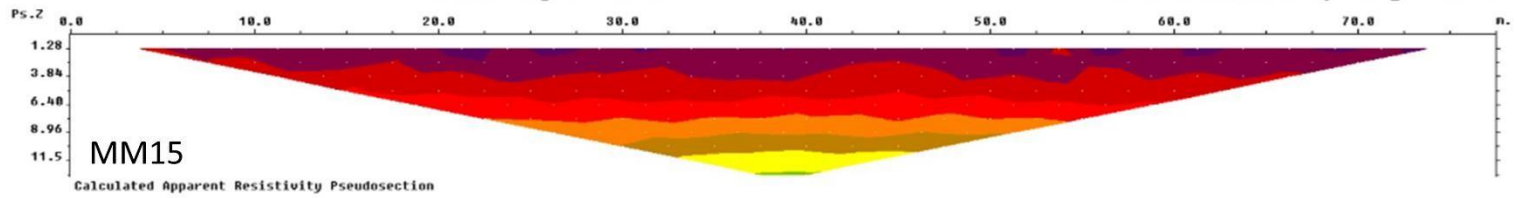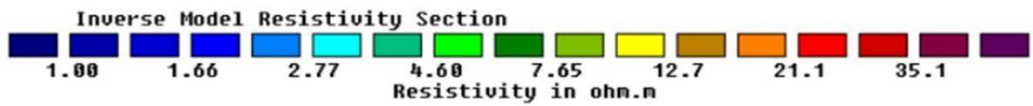

Unit electrode spacing 2.50 m.

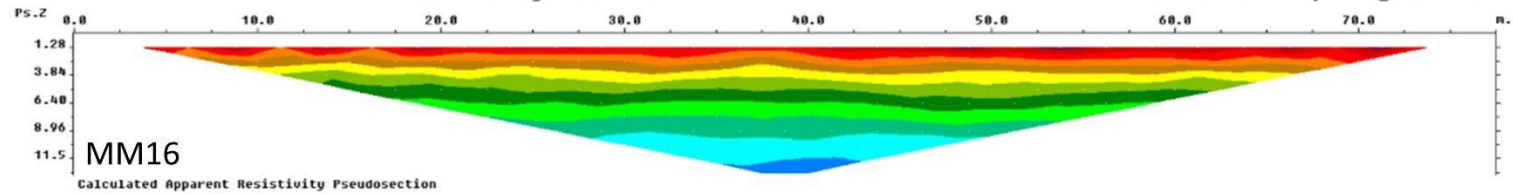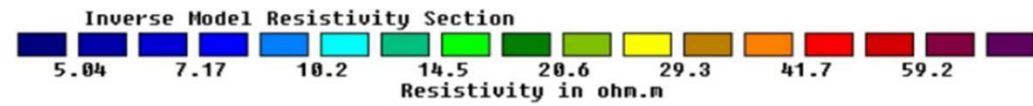

Unit electrode spacing 2.50 m.



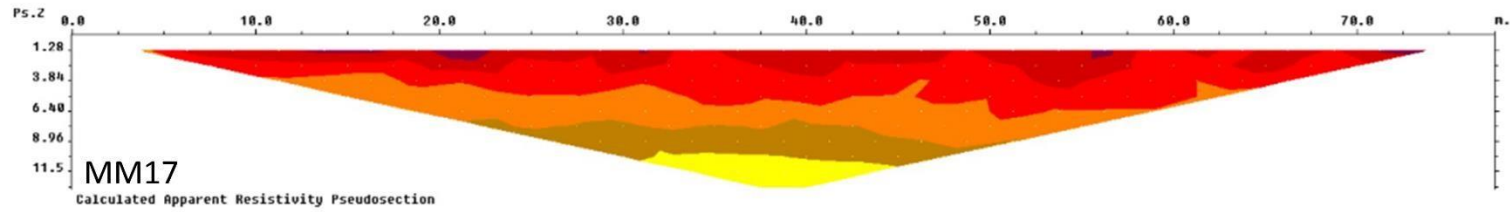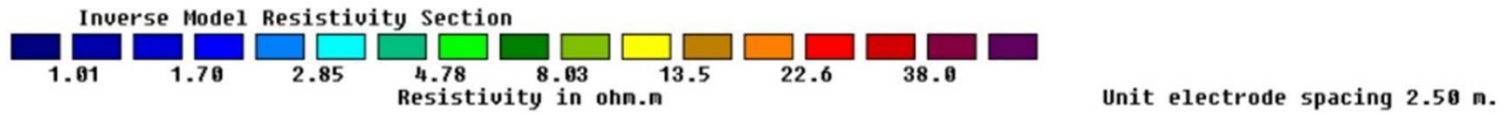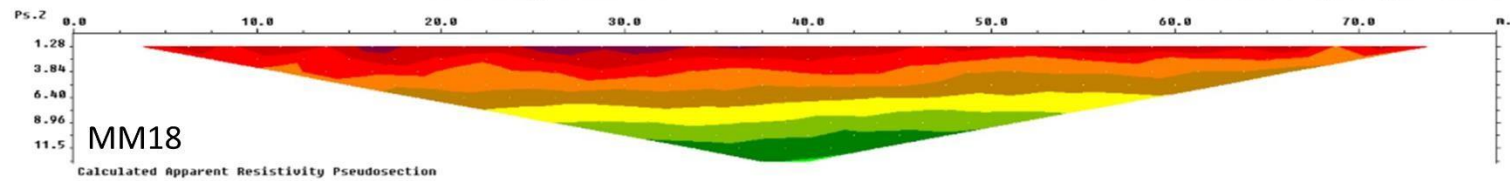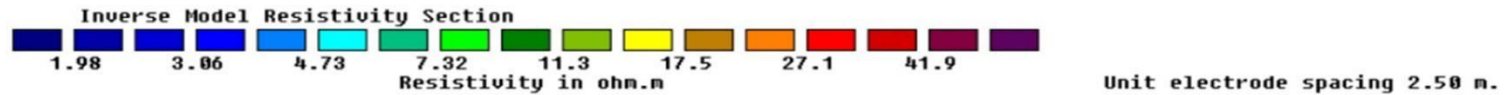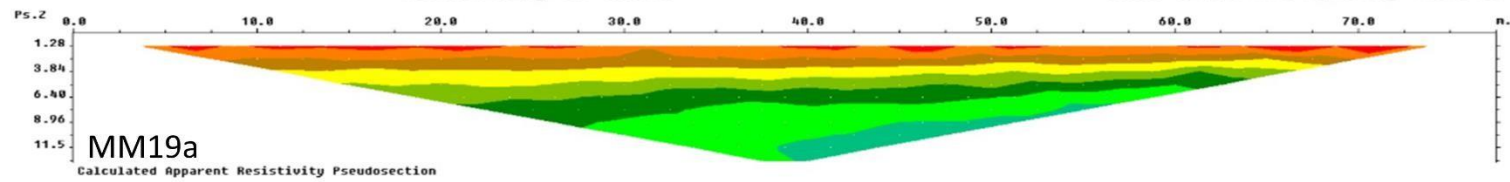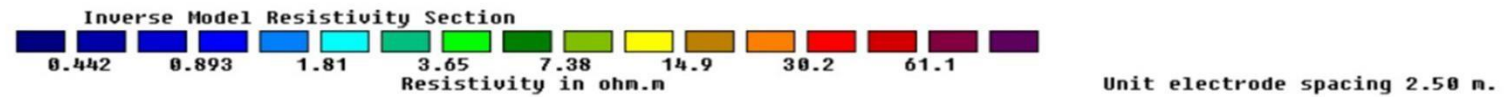

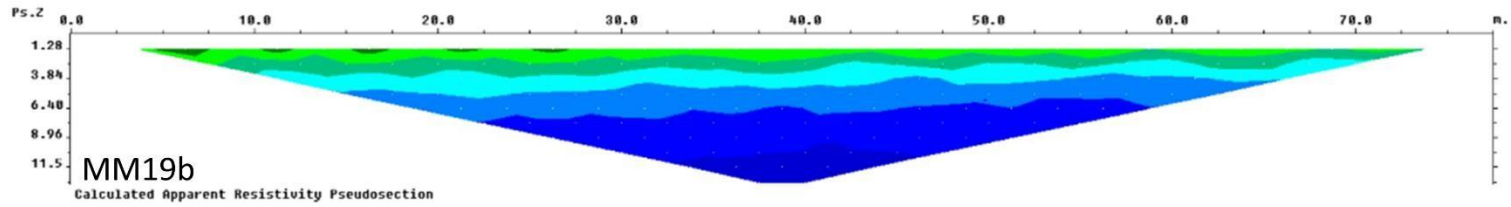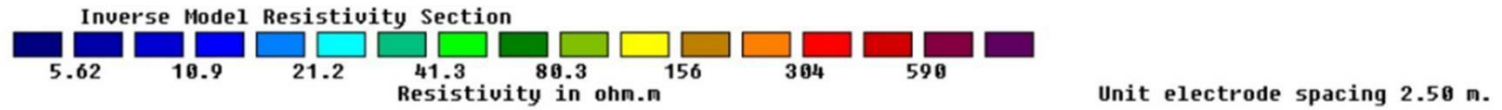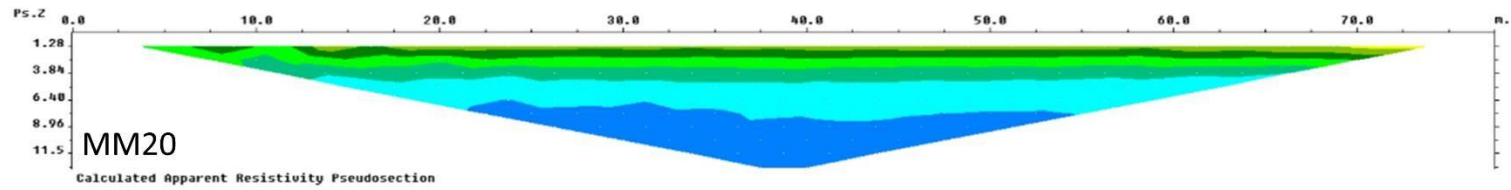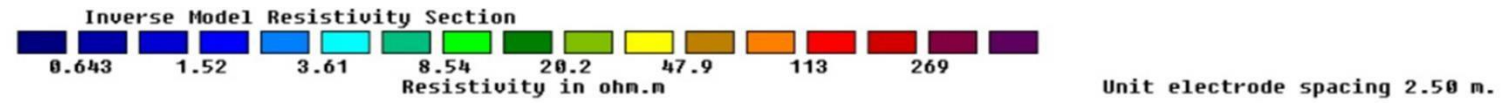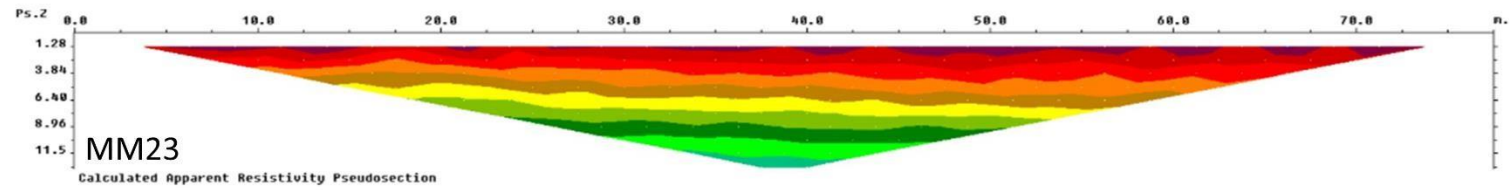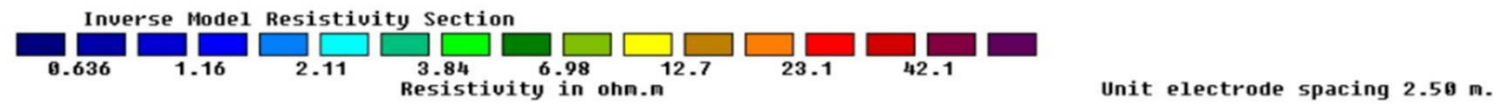



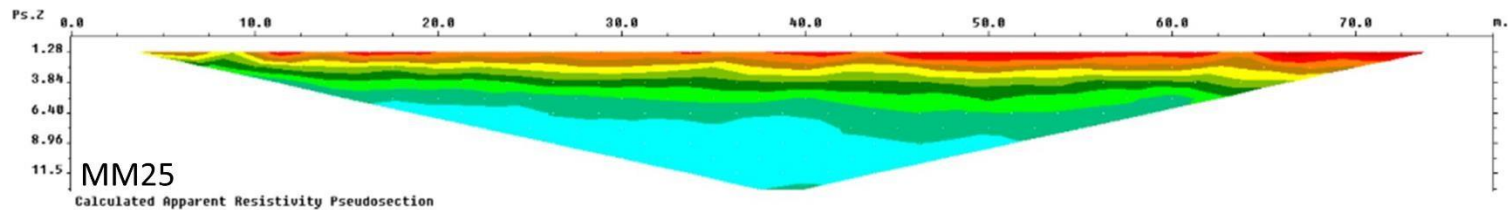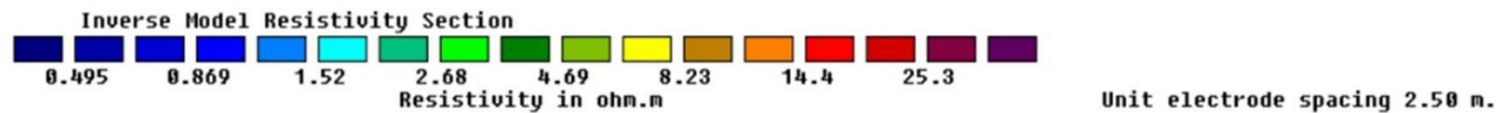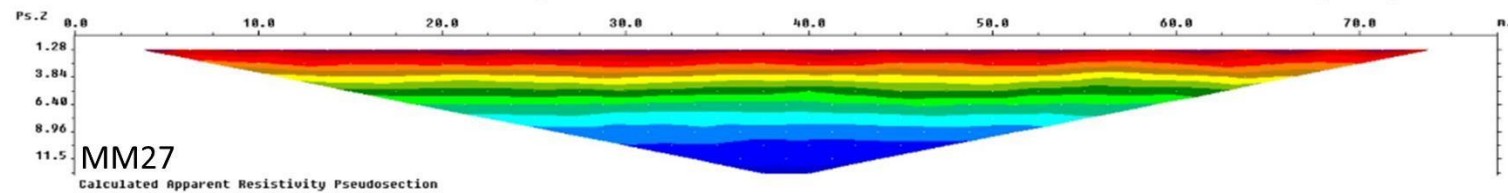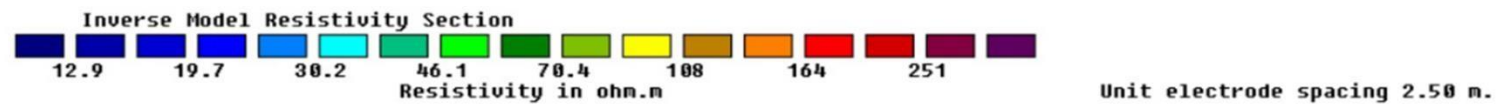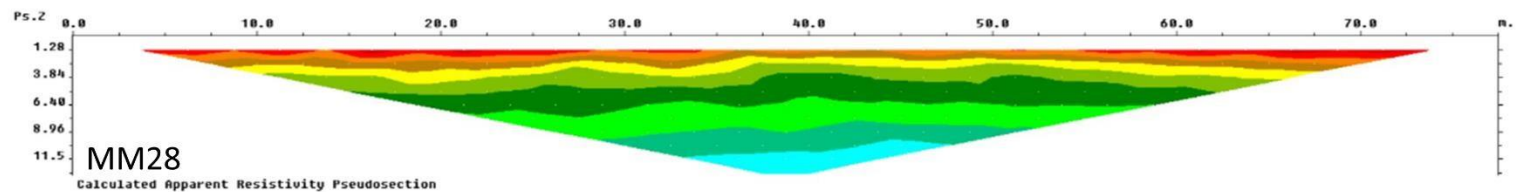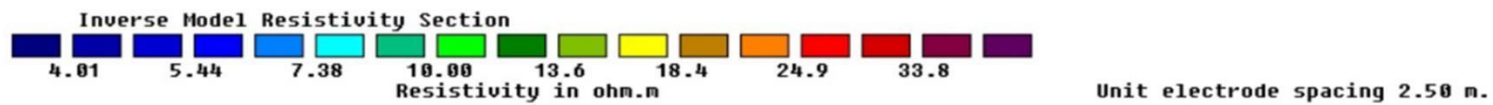

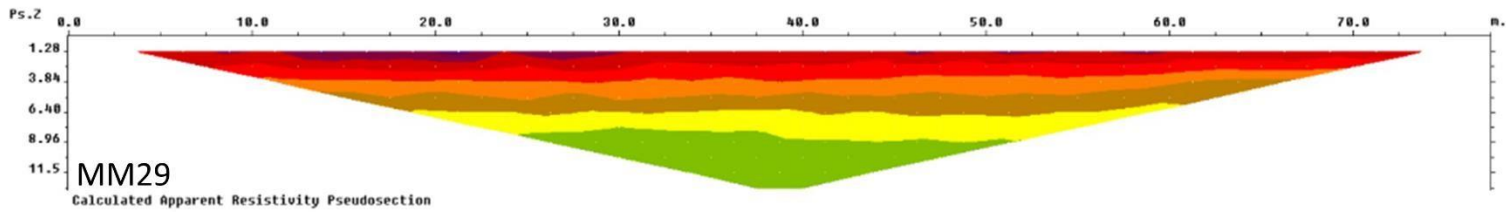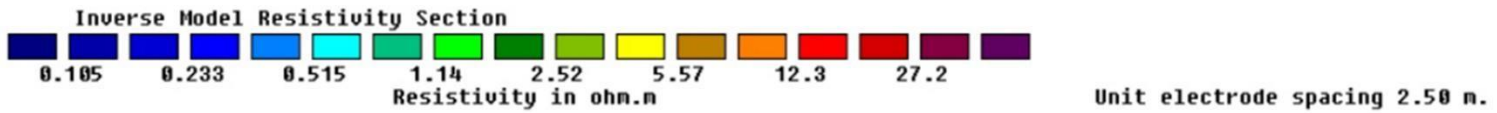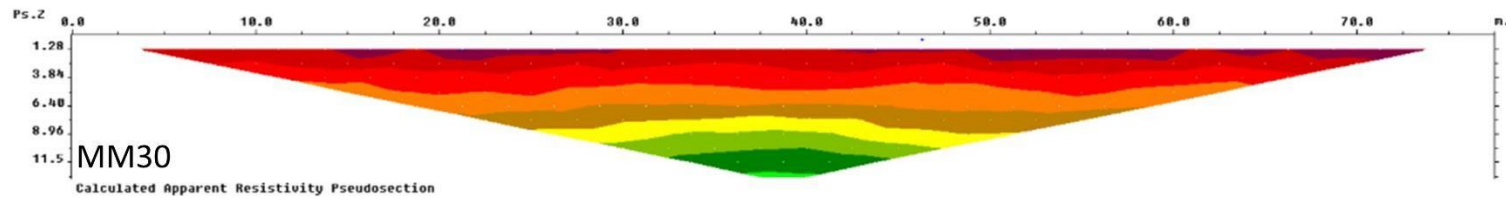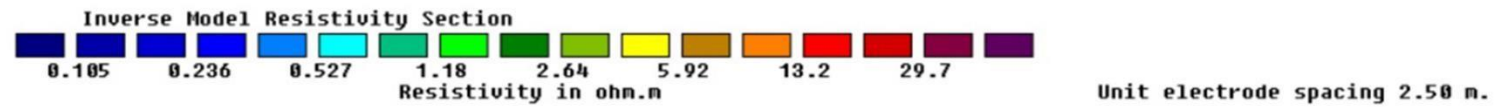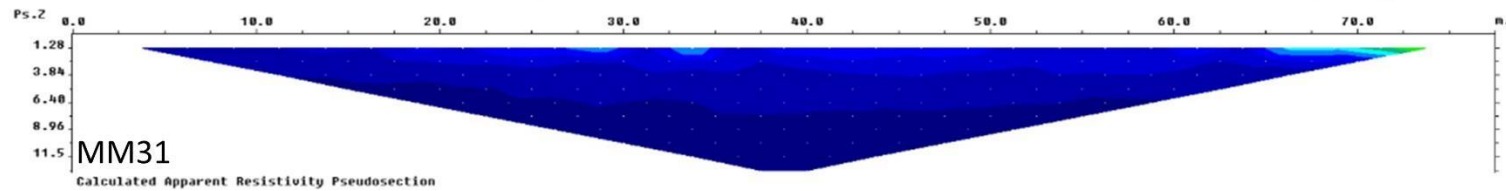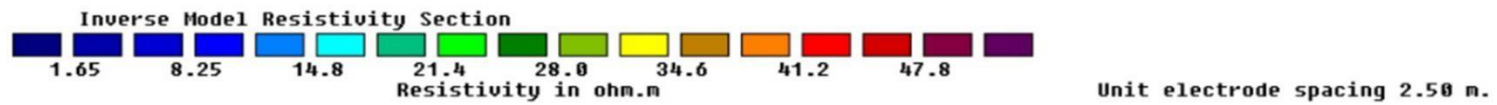

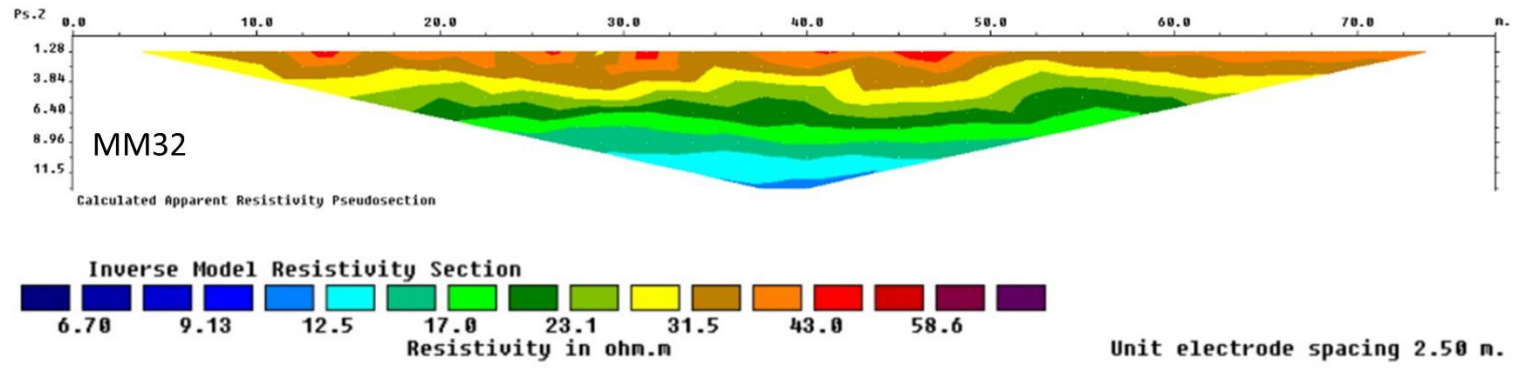

## Section F: Geostatistical Variograms

Variograms for the Inferred Water Level (m MSL) for the winter (A) and summer season (B), Inferred Freshwater Saline Interface (m MSL) in February 2021 (C) and August 2021 (D), and Freshwater Lens Thickness (m) in the February 2021 (E) and August 2021 (F).

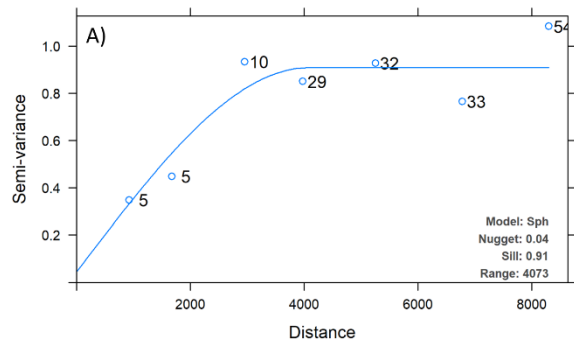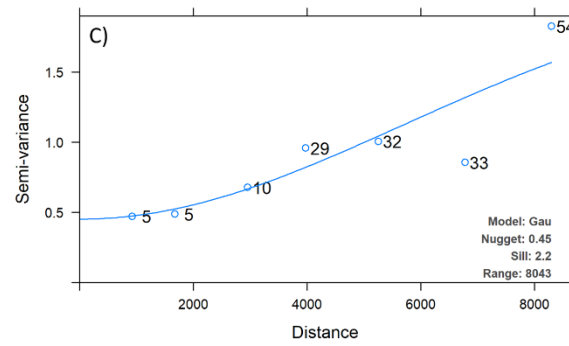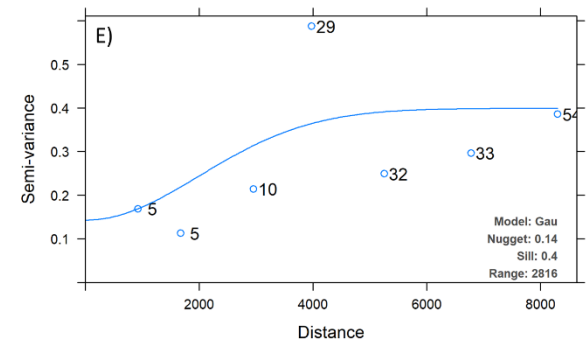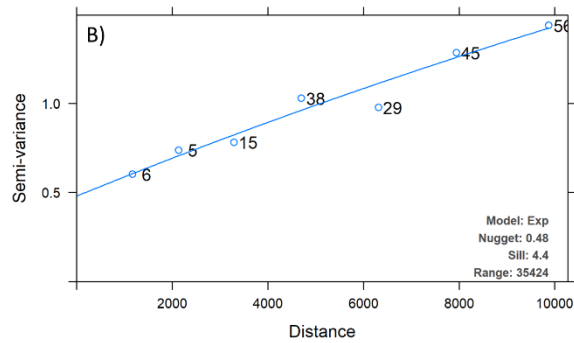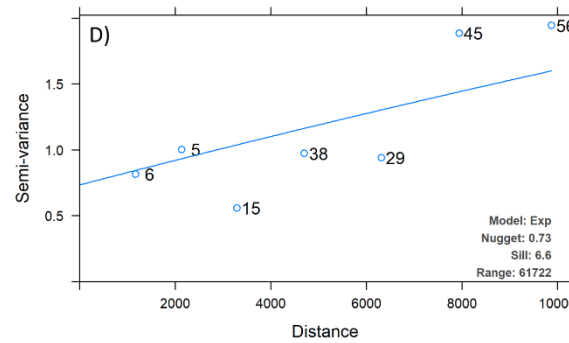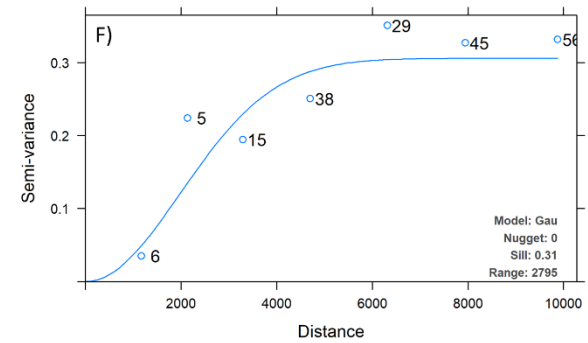

Section G: Water Level and Freshwater-Saline Interface Variance Error Maps

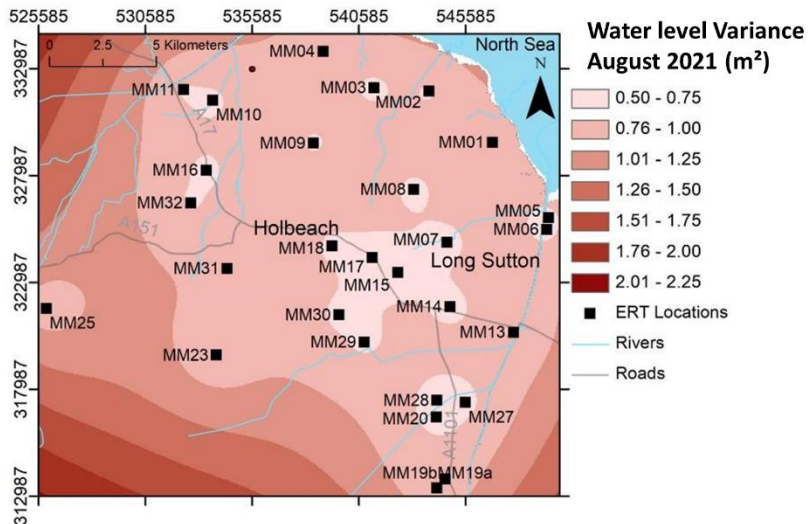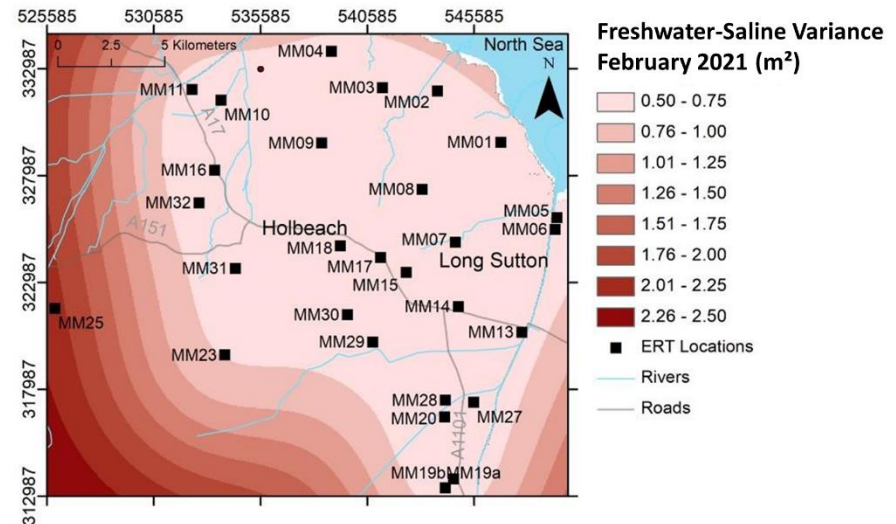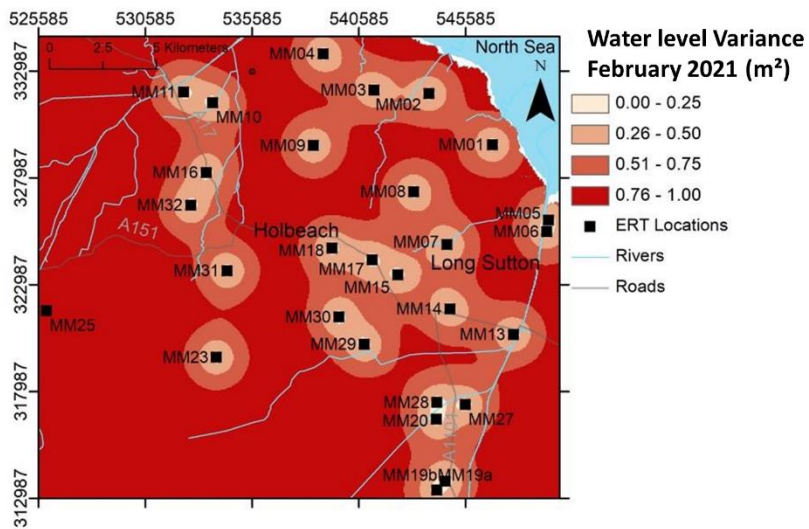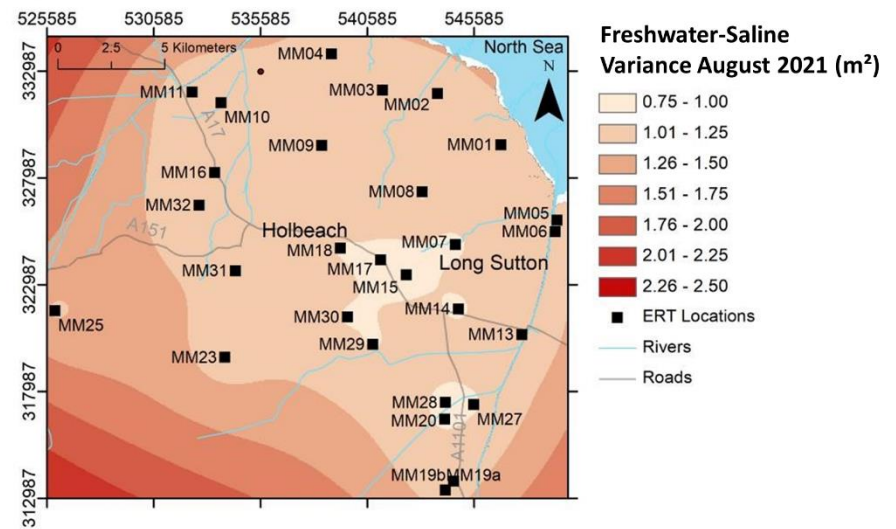

Supplement: MOESM1 [file 23941662]
